# Supplementary material for: Optimizing Strategies for Improving Mental Health in Victoria, Australia during the COVID-19 Era: A System Dynamics Modelling Study
Source: MDPI journal article supplement (doi:10.3390/ijerph19116470), 2022-05-26
Supplement: s1 [file s1]

## SUPPLEMENTARY MATERIAL

**Supplementary Figure S1. Overview of the causal structure of the system dynamics model.**

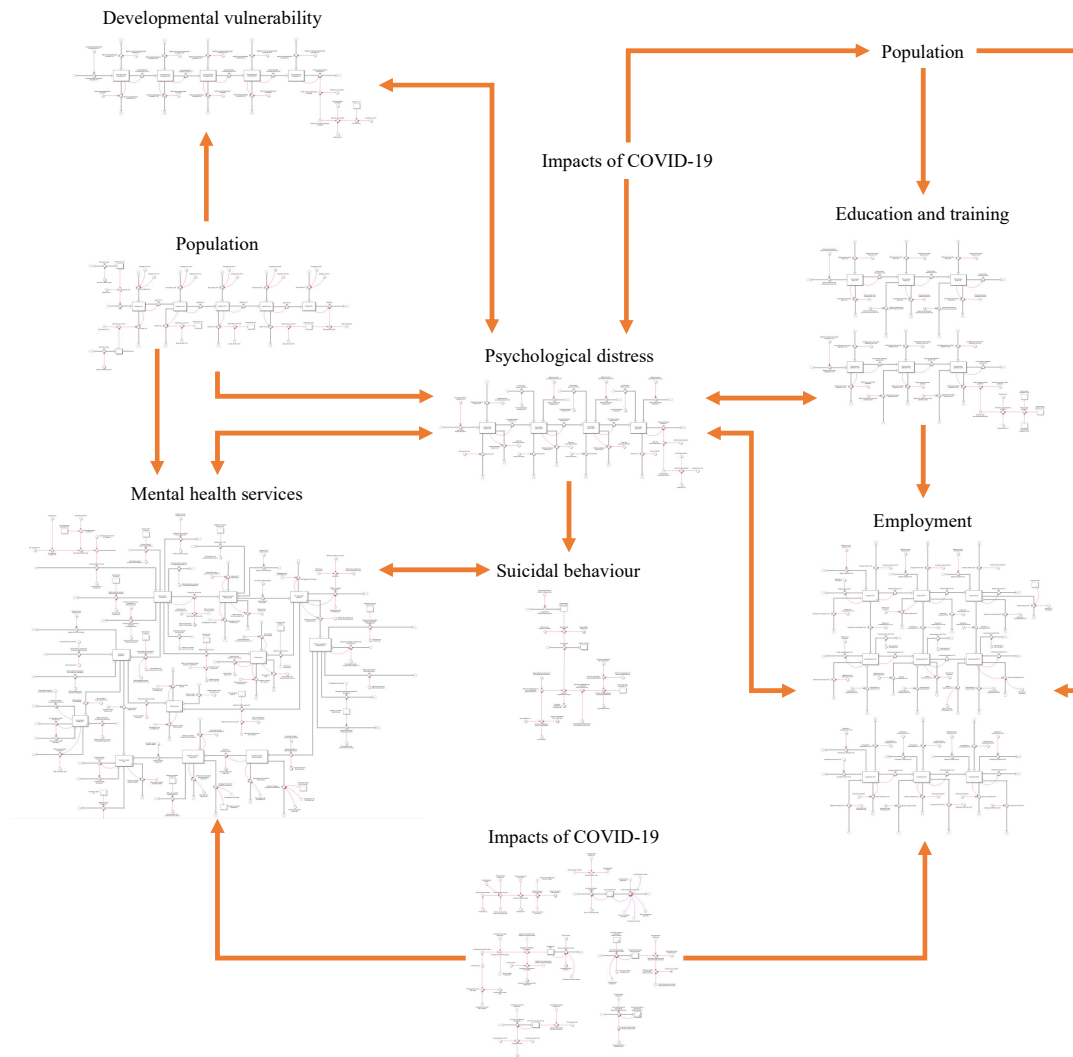

**Supplementary Figure S2. Adverse mental health outcome estimates derived from the model and the corresponding historical data from the Australian Bureau of Statistics (ABS) and the Australian Institute of Health and Welfare (AIHW).**

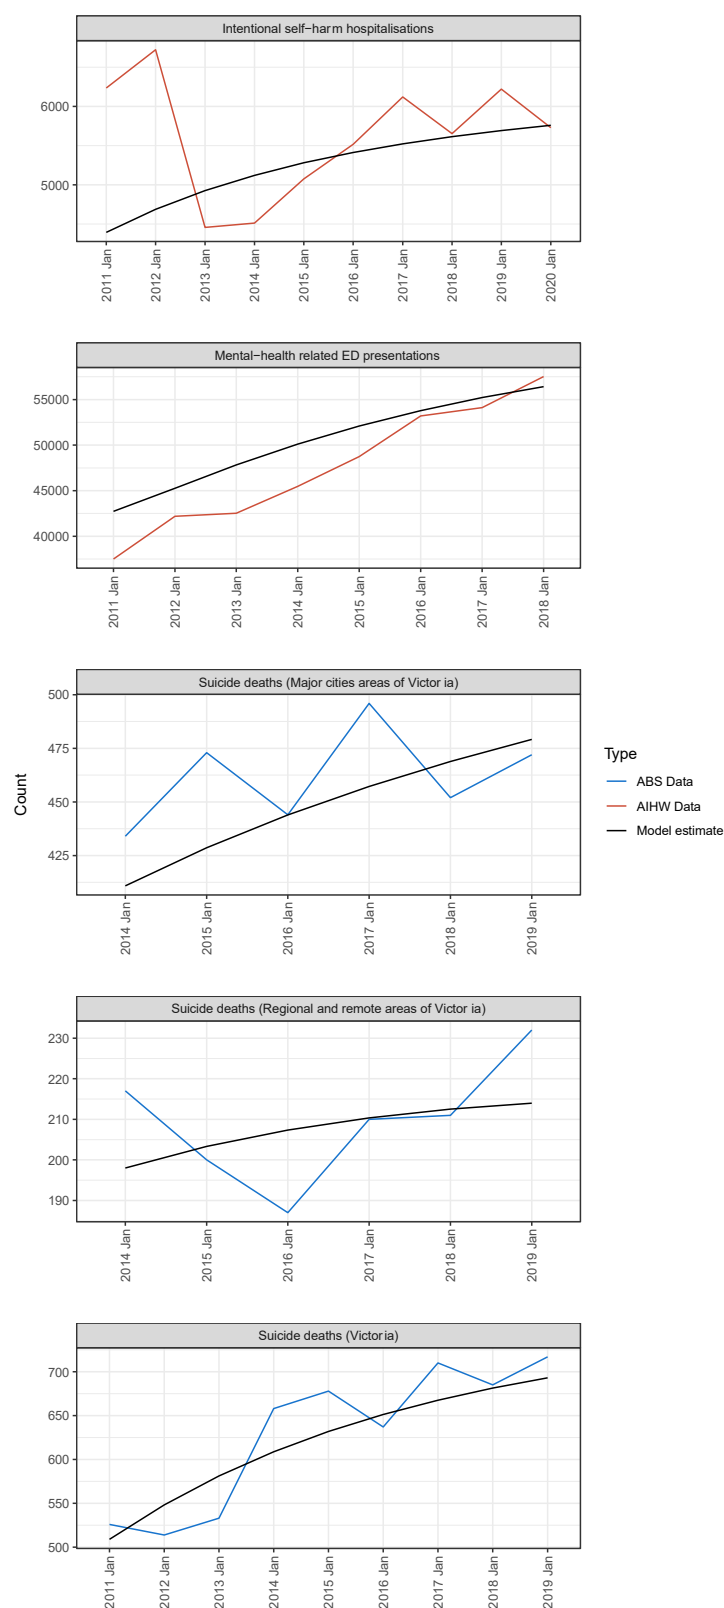

**Supplementary Table S1. Interventions and default parameter values. Parameter values can be modified via an interactive dashboard to assess the impact of different parameter values on simulated outputs.**

| Intervention                 | Description                                                                                                                                                                                                                                                                                                                                                                                                                                                                                                                                                                                                                                                                                                                                                                                                                                                                                                                                                                                                                                                                                                                                                                                                                                                                                                                                                                                                                                                                                                                                                                                                                                                                                                                                                                                                     |
|------------------------------|-----------------------------------------------------------------------------------------------------------------------------------------------------------------------------------------------------------------------------------------------------------------------------------------------------------------------------------------------------------------------------------------------------------------------------------------------------------------------------------------------------------------------------------------------------------------------------------------------------------------------------------------------------------------------------------------------------------------------------------------------------------------------------------------------------------------------------------------------------------------------------------------------------------------------------------------------------------------------------------------------------------------------------------------------------------------------------------------------------------------------------------------------------------------------------------------------------------------------------------------------------------------------------------------------------------------------------------------------------------------------------------------------------------------------------------------------------------------------------------------------------------------------------------------------------------------------------------------------------------------------------------------------------------------------------------------------------------------------------------------------------------------------------------------------------------------|
| <b>a. Awareness programs</b> | <p>Population-wide mental health education programs aimed at reducing stigma, improving recognition of suicide risk, and encouraging help-seeking. This intervention increases the per capita rates at which people perceive a need for mental health services and seek help from a general practitioner or online services. Parameters that can be modified are:</p> <p><i>Starting year</i> — the year in which mental health awareness campaigns commence (the default is 2022, or January 2022).</p> <p><i>Implementation time (years)</i> — the time after commencement required for mental health awareness campaigns to be fully implemented (the default is 0.167 years, or 2 months).</p> <p><i>Program duration (years)</i> — the duration of mental health awareness campaigns (the default is 5 years).</p> <p><i>Effect on engagement</i> — the multiplicative effect of mental health awareness campaigns on the per capita rates that people perceive a need for mental health care, seek help from a general practitioner, or access online services. The default value (1.585) is derived from Jorm et al. (2003) .</p> <p><i>Effect decay rate per year</i> — the fractional rate per year at which the effect on engagement decreases to a value of 1 (i.e., no effect) after mental health awareness campaigns end. The default value (1) implies that the effect on engagement would decrease to a value of 1 in 1 year given the initial rate of decline (i.e., the rate immediately after awareness campaigns end). Note that the rate of decline in the effect of awareness campaigns itself declines as the effect approaches a value of 1, so the actual time required for the effect to decay completely will generally be greater than the inverse of the decay rate specified.</p> |
| <b>b. Education programs</b> | <p>Programs providing financial support to students who have become unemployed due to the COVID-19 pandemic, enabling them to continue studying. This intervention reduces the per capita rate that students discontinue post-secondary study as a direct result of job loss. The per capita rate of enrolment in post-secondary study among people aged 15-24 years can also be modified. Parameters that can be modified are:</p> <p><i>Starting year</i> — the year in which education programs commence (the default is 2022, or January 2022).</p> <p><i>Implementation time (years)</i> — the time required for education programs to be fully implemented (the default is 0.167 years, or 2 months).</p>                                                                                                                                                                                                                                                                                                                                                                                                                                                                                                                                                                                                                                                                                                                                                                                                                                                                                                                                                                                                                                                                                                 |

|                                     |                                                                                                                                                                                                                                                                                                                                                                                                                                                                                                                                                                                                                                                                                                                                                                                                                                                                                                                                                                                                                                                                                                                                                                                                                                                                                                                                           |
|-------------------------------------|-------------------------------------------------------------------------------------------------------------------------------------------------------------------------------------------------------------------------------------------------------------------------------------------------------------------------------------------------------------------------------------------------------------------------------------------------------------------------------------------------------------------------------------------------------------------------------------------------------------------------------------------------------------------------------------------------------------------------------------------------------------------------------------------------------------------------------------------------------------------------------------------------------------------------------------------------------------------------------------------------------------------------------------------------------------------------------------------------------------------------------------------------------------------------------------------------------------------------------------------------------------------------------------------------------------------------------------------|
|                                     | <p><i>Program duration (years)</i> — the duration of education programs (the default is 5 years).</p> <p><i>Effect on discontinuation</i> — the multiplicative effect of education programs on the proportion of students discontinuing post-secondary study due to job loss. The default value (0.1) assumes that education programs reduce the proportion of students discontinuing study after becoming unemployed by 90%.</p> <p><i>Effect on enrolment</i> — the multiplicative effect of education programs on the per capita enrolment rate for 15-24-year-olds. For this intervention, we used a value of 2 to increase the per capita enrolment rate for 15-24-year-olds by 100%.</p>                                                                                                                                                                                                                                                                                                                                                                                                                                                                                                                                                                                                                                            |
| <b>c. Jobs creation program</b>     | <p>Programs designed to increase the per capita rate of employment initiation. Parameters that can be modified are:</p> <p><i>Starting year</i> — the year in which jobs creation programs commence (the default is 2022, or January 2022).</p> <p><i>Implementation time (years)</i> — the time required for jobs creation programs to be fully implemented (the default is 0.167 years, or 2 months).</p> <p><i>Program duration (years)</i> — the duration of jobs creation programs (the default is 2 years which will end the Jobs creation program in January 2024).</p> <p><i>Effect on employment initiation</i> — the multiplicative effect of employment programs on the per capita employment initiation rate. For this intervention, we used a value of 2 to increase the rate at which people secure employment by 100%.</p>                                                                                                                                                                                                                                                                                                                                                                                                                                                                                                 |
| <b>d. Post-suicide attempt care</b> | <p>Post-attempt care is an active outreach and enhanced contact program that aims to reduce re-admission in those presenting to services after a suicide attempt. It includes individually tailored contact, solution focused counselling, and motivations to ensure adherence to follow-up treatments and continuity of contact. Parameters that can be modified are:</p> <p><i>Starting year</i> — the year in which post-attempt care programs commence (the default is 2022, or January 2022).</p> <p><i>Implementation time (years)</i> — the time after commencement required for post-attempt care programs to be fully implemented (the default is 2 years).</p> <p><i>Program duration (years)</i> — the duration of post-attempt care programs (the default is set to 1000 years, ensuring that programs remain in place until the end of the simulation).</p> <p><i>Maximum rate</i> — the maximum proportion of patients hospitalised for a suicide attempt receiving post-attempt care. The default value (0.7) assumes that post-attempt care will be provided to 70% of patients hospitalised for a suicide attempt when post-attempt care programs are fully implemented.</p> <p><i>Post-attempt care effect</i> — the proportion of potential repeat suicide attempts expected among patients receiving post-attempt</p> |

|                                                      |                                                                                                                                                                                                                                                                                                                                                                                                                                                                                                                                                                                                                                                                                                                                                                                                                                                                                                                                                                                                                                                                                                                                                                                                                                                                                                                                                                                                                                                                                                                                                                                                                                                                                                                                                                                                                                                                                                                                                                                                                                                               |
|------------------------------------------------------|---------------------------------------------------------------------------------------------------------------------------------------------------------------------------------------------------------------------------------------------------------------------------------------------------------------------------------------------------------------------------------------------------------------------------------------------------------------------------------------------------------------------------------------------------------------------------------------------------------------------------------------------------------------------------------------------------------------------------------------------------------------------------------------------------------------------------------------------------------------------------------------------------------------------------------------------------------------------------------------------------------------------------------------------------------------------------------------------------------------------------------------------------------------------------------------------------------------------------------------------------------------------------------------------------------------------------------------------------------------------------------------------------------------------------------------------------------------------------------------------------------------------------------------------------------------------------------------------------------------------------------------------------------------------------------------------------------------------------------------------------------------------------------------------------------------------------------------------------------------------------------------------------------------------------------------------------------------------------------------------------------------------------------------------------------------|
|                                                      | <p>care. The default value (0.398) implies that 39.8% of repeat attempts that would have occurred without post-attempt care actually occur when post-attempt care is provided; i.e., post-attempt care is assumed to prevent 60.2% of potential repeat suicide attempts. The default estimate is derived from Hvid et al. (2011)</p> <p><i>Repeat self-harm rate per year</i> – the probability that a person will self-harm in the year after a suicide attempt without post-attempt care. The default value (0.179) implies that 17.9% of people hospitalised for self-harm will re-attempt within 1 year (i.e., assuming they don't receive post-attempt care); this estimate is derived from Carroll, Metcalfe, and Gunnell (2014)</p>                                                                                                                                                                                                                                                                                                                                                                                                                                                                                                                                                                                                                                                                                                                                                                                                                                                                                                                                                                                                                                                                                                                                                                                                                                                                                                                    |
| <b>e. Services capacity growth</b>                   | <p><i>GP mental health services</i> — multiplies the annual rate of increase in the total number of mental health-related GP consultations that can be completed per week. The default value (1) corresponds to the business as usual case, in which services capacity continues to increase at the current rate, estimated using Medicare Benefits Schedule (MBS) data for 2011-2019 assuming services were operating at (near-) maximum capacity over this period. For this intervention, we increased the annual rate of increase by 100% (i.e. set the value to 2).</p> <p><i>Psychiatrist and allied services</i> — multiplies the annual rate of increase in the total number of psychiatrist and allied services that can be provided per week. The default value (1) corresponds to the business as usual case, in which services capacity continues to increase at the current rate, estimated using Medicare Benefits Schedule (MBS) data for 2011-2019 assuming services were operating at (near-) maximum capacity over this period. For this intervention, we increased the annual rate of increase by 100% (i.e. set the value to 2).</p> <p><i>Community mental health</i> — multiplies the annual increase in the total number of community mental health service contacts that can be provided per week. The default value (1) corresponds to the business as usual case, in which services capacity continues to increase at the current rate, estimated using data for the period 2011-2019 published by the Australian Institute of Health and Welfare (available at: <a href="https://www.aihw.gov.au/reports-data/health-welfare-services/mental-health-services/data">https://www.aihw.gov.au/reports-data/health-welfare-services/mental-health-services/data</a>). For this intervention, we increased the annual rate of increase by 100% (i.e. set the value to 2).</p> <p>This multiplicative increase in services capacity growth rates commences in January 2022 and this remains in place until the end of the simulation.</p> |
| <b>f. Technology-enabled, measurement-based care</b> | <p>Technology-enabled, measurement-based care involves the use of online technology to facilitate delivery of multidisciplinary team-based care, in which medical and allied health professionals consider all relevant treatment options and collaboratively develop an individual treatment and care plan for each patient. Online technology improves coordination of care and facilitates communication between medical and allied health professionals, as each health professional involved in the care of a patient has access to the same information about that patient's treatment history.</p> <p>Parameters that can be modified in this intervention are:</p> <p><i>Starting year</i> — the year in which technology-enabled, measurement-based care is introduced (the default is 2022, or January 2022).</p>                                                                                                                                                                                                                                                                                                                                                                                                                                                                                                                                                                                                                                                                                                                                                                                                                                                                                                                                                                                                                                                                                                                                                                                                                                   |

|                            |                                                                                                                                                                                                                                                                                                                                                                                                                                                                                                                                                                                                                                                                                                                                                                                                                                                                                                                                                                                                                                                                                                                                                                                                                                                                                                                                                                                                                                                                                                                                                                                                                                                                                                                                                                                                                                                                                                                                                                                                                                                                                                                                                                                                                                                                                                                                                                                                                                                                                                                                                                                          |
|----------------------------|------------------------------------------------------------------------------------------------------------------------------------------------------------------------------------------------------------------------------------------------------------------------------------------------------------------------------------------------------------------------------------------------------------------------------------------------------------------------------------------------------------------------------------------------------------------------------------------------------------------------------------------------------------------------------------------------------------------------------------------------------------------------------------------------------------------------------------------------------------------------------------------------------------------------------------------------------------------------------------------------------------------------------------------------------------------------------------------------------------------------------------------------------------------------------------------------------------------------------------------------------------------------------------------------------------------------------------------------------------------------------------------------------------------------------------------------------------------------------------------------------------------------------------------------------------------------------------------------------------------------------------------------------------------------------------------------------------------------------------------------------------------------------------------------------------------------------------------------------------------------------------------------------------------------------------------------------------------------------------------------------------------------------------------------------------------------------------------------------------------------------------------------------------------------------------------------------------------------------------------------------------------------------------------------------------------------------------------------------------------------------------------------------------------------------------------------------------------------------------------------------------------------------------------------------------------------------------------|
|                            | <p><i>Implementation time (years)</i> — the time required for technology-enabled, measurement-based care to be fully implemented (the default is 2 years).</p> <p><i>Program duration (years)</i> — the duration of investment in technology-enabled, measurement-based care (the default is set to 1000 years, ensuring that investment continues until the end of the simulation).</p> <p><i>Maximum rate per service</i> — the maximum proportion of mental health services provided that involve technology-enabled, measurement-based care. This proportion will depend on the number of medical and allied health professionals adopting online care coordination technologies, as well as the number of patients consenting to the use of these technologies in the management of their care (i.e., take-up among service providers and patients). The default value (0.7) assumes that technology-enabled, measurement-based care will be provided in 70% of mental health services completed when fully implemented.</p> <p><i>Effect on recovery rate</i> — the multiplicative effect of technology-enabled coordinated care on the per-service recovery rate (i.e., the probability that a patient's level of psychological distress will decrease after receiving treatment). The default estimate (1.177) is derived from Woltmann et al. (2012), and implies that technology-enabled coordinated care increases the per-service probability of a reduction in psychological distress by 17.7%.</p> <p><i>Effect on referral rate</i> — the multiplicative effect of technology-enabled, measurement-based care on general practitioners' rates of referral to specialised mental health services (psychiatrists and allied mental health services). The default value (1.266) implies that technology-enabled, measurement-based care increases the per-consultation probability that a general practitioner will refer a patient with moderate to very high psychological distress to specialised psychiatric care by 26.6%, and is derived from Badamgarav et al. (2003).</p> <p><i>Effect on disengagement</i> — the multiplicative effect of technology-enabled, measurement-based care on per capita rates of disengagement from mental health services (including disengagement while waiting for services and disengagement resulting from dissatisfaction with services received). The default estimate (0.520) is derived from Badamgarav et al. (2003), and implies that technology-enabled, measurement-based care reduces rates of disengagement by 48.0%.</p> |
| <b>Employment programs</b> | <p>As employment programs were implemented by the Australian government in response to the COVID-19 pandemic, this intervention was enabled for the COVID-19 baseline scenario model calibration.</p> <p>These employment programs are designed to stem rapidly increasing unemployment due to the COVID-19 pandemic (e.g., the JobKeeper Payment). This intervention reduces the increase in the per capita job loss rate resulting directly from the pandemic. The per capita rate of employment initiation can also be increased (or decreased); however, the default settings assume that employment programs have no direct effect on employment initiation. Parameters that can be modified are:</p> <p><i>Starting year</i> — the year in which employment programs commence (the default is 2020.33, or May 2020).</p>                                                                                                                                                                                                                                                                                                                                                                                                                                                                                                                                                                                                                                                                                                                                                                                                                                                                                                                                                                                                                                                                                                                                                                                                                                                                                                                                                                                                                                                                                                                                                                                                                                                                                                                                                           |

|                      |                                                                                                                                                                                                                                                                                                                                                                                                                                                                                                                                                                                                                                                                                                                                                                                                                                                                                                                                                                                                                                                                                                                                                                                                                                                                                                                                                                                                                                                                                                                                                                                                                                                                                                                                                                                                                                                                                                |
|----------------------|------------------------------------------------------------------------------------------------------------------------------------------------------------------------------------------------------------------------------------------------------------------------------------------------------------------------------------------------------------------------------------------------------------------------------------------------------------------------------------------------------------------------------------------------------------------------------------------------------------------------------------------------------------------------------------------------------------------------------------------------------------------------------------------------------------------------------------------------------------------------------------------------------------------------------------------------------------------------------------------------------------------------------------------------------------------------------------------------------------------------------------------------------------------------------------------------------------------------------------------------------------------------------------------------------------------------------------------------------------------------------------------------------------------------------------------------------------------------------------------------------------------------------------------------------------------------------------------------------------------------------------------------------------------------------------------------------------------------------------------------------------------------------------------------------------------------------------------------------------------------------------------------|
|                      | <p><i>Implementation time (years)</i> — the time required for employment programs to be fully implemented (the default is 0.167 years, or 2 months).</p> <p><i>Program duration (years)</i> — the duration of employment programs (the default is 0.917 years, 11 months. With the starting year set at 2020.33, this will set Employment programs to end in April 2021).</p> <p><i>Effect on job loss</i> — the multiplicative effect of employment programs on the increase in the job loss rate due to the COVID-19 pandemic. The default value (0.56) assumes that employment programs will reduce the increase in the per capita job loss rate by 44% (Australian Bureau of Statistics, 2020).</p> <p><i>Effect on employment initiation</i> — the multiplicative effect of employment programs on the per capita employment initiation rate. The default value (1) assumes no effect of employment programs on employment initiation.</p>                                                                                                                                                                                                                                                                                                                                                                                                                                                                                                                                                                                                                                                                                                                                                                                                                                                                                                                                                |
| <b>Better Access</b> | <p>As this program was implemented by the Australian government in response to the COVID-19 pandemic, this intervention was enabled for the COVID-19 baseline scenario model calibration.</p> <p>Reform of the existing <i>Better Access to Psychiatrists, Psychologists and General Practitioners through the MBS</i> (Better Access) initiative to provide patients with access to a greater number of specialised mental health care consultations per year. This intervention increases the flow of people with a perceived need for mental health care into psychiatrist and allied mental health services. Parameters that can be modified are:</p> <p><i>Starting year</i> — the year in which the reformed Better Access initiative commences (the default is 2020.75, or October 2020).</p> <p><i>Implementation time (years)</i> — the time after commencement required for the reformed Better Access initiative to be fully implemented (the default is 0.167 years, or 2 months).</p> <p><i>Program duration (years)</i> — the duration of the reformed Better Access initiative. The default is set to 1.75 years which sets the Better Access program to end in June 2022).</p> <p><i>Services per week</i> — the average number of specialised mental health care services provided per patient per week. The default value (1) assumes that patients attend 1 consultation per week, so that a patient attending a total of 4 consultations (for example) is assumed to do so over a period of 4 weeks.</p> <p><i>Additional services per patient</i> — the mean number of additional specialised mental health care services provided per patient per year under the reformed Better Access scheme. The default value (4) assumes that patients will attend an additional 4 consultations per year when the cap on the number of consultations per patient is increased.</p> |

**Supplementary Table S2. Differences in projected cumulative adverse mental health events between March 2020 and March 2026 in Victoria, major cities areas of Victoria, regional and remote areas of Victoria, and Victorians aged 15-24 years. Outcomes are compared to COVID-19 baseline after various interventions. Events are rounded to the nearest integer and percent reduction is calculated from these rounded events numbers.**

|                                                                   | Suicide deaths |           |             | Intentional self-harm hospitalisations |           |             | Mental-health related ED presentations |           |             |
|-------------------------------------------------------------------|----------------|-----------|-------------|----------------------------------------|-----------|-------------|----------------------------------------|-----------|-------------|
|                                                                   | Count          | Prevented | % Reduction | Count                                  | Prevented | % Reduction | Count                                  | Prevented | % Reduction |
| <b>Victoria</b>                                                   |                |           |             |                                        |           |             |                                        |           |             |
| Baseline                                                          | 4,578          |           |             | 37,528                                 |           |             | 365,060                                |           |             |
| a. Awareness campaigns                                            | 4,602          | -24       | -0.52%      | 37,706                                 | -178      | -0.47%      | 392,686                                | -27626    | -7.57%      |
| b. Education programs                                             | 4,573          | 5         | 0.11%       | 37,433                                 | 95        | 0.25%       | 364,665                                | 395       | 0.11%       |
| c. Jobs creation programs until 2024                              | 4,545          | 33        | 0.72%       | 37,218                                 | 310       | 0.83%       | 363,357                                | 1703      | 0.47%       |
| d. Post-suicide attempt care starting in Jan 2022                 | 4,456          | 122       | 2.66%       | 36,548                                 | 980       | 2.61%       | 364,054                                | 1006      | 0.28%       |
| e. Post-suicide attempt care starting in Jan 2023                 | 4,507          | 71        | 1.55%       | 36,960                                 | 568       | 1.51%       | 364,475                                | 585       | 0.16%       |
| f. Post-suicide attempt care starting in Jan 2024                 | 4,551          | 27        | 0.59%       | 37,308                                 | 220       | 0.59%       | 364,832                                | 228       | 0.06%       |
| g. Services capacity increase by 100% and technology-enabled care | 4,542          | 36        | 0.79%       | 37,267                                 | 261       | 0.70%       | 358,448                                | 6612      | 1.81%       |
| h. Interventions b, c, d, g                                       | 4,381          | 197       | 4.30%       | 35,878                                 | 1650      | 4.40%       | 355,001                                | 10059     | 2.76%       |
|                                                                   |                |           |             |                                        |           |             |                                        |           |             |
| <b>Major cities areas of Victoria</b>                             |                |           |             |                                        |           |             |                                        |           |             |
| Baseline                                                          | 3,231          |           |             | 26,406                                 |           |             | 251,965                                |           |             |
| a. Awareness campaigns                                            | 3,245          | -14       | -0.43%      | 26,508                                 | -102      | -0.39%      | 270,686                                | -18721    | -7.43%      |
| b. Education programs                                             | 3,227          | 4         | 0.12%       | 26,331                                 | 75        | 0.28%       | 251,658                                | 307       | 0.12%       |
| c. Jobs creation programs until 2024                              | 3,208          | 23        | 0.71%       | 26,187                                 | 219       | 0.83%       | 250,777                                | 1188      | 0.47%       |
| d. Post-suicide attempt care starting in Jan 2022                 | 3,144          | 87        | 2.69%       | 25,712                                 | 694       | 2.63%       | 251,257                                | 708       | 0.28%       |
| e. Post-suicide attempt care starting in Jan 2023                 | 3,181          | 50        | 1.55%       | 26,003                                 | 403       | 1.53%       | 251,552                                | 413       | 0.16%       |
| f. Post-suicide attempt care starting in Jan 2024                 | 3,211          | 20        | 0.62%       | 26,249                                 | 157       | 0.59%       | 251,803                                | 162       | 0.06%       |
| g. Services capacity increase by 100% and technology-enabled care | 3,206          | 25        | 0.77%       | 26,225                                 | 181       | 0.69%       | 247,508                                | 4457      | 1.77%       |
| h. Interventions b, c, d, g                                       | 3,092          | 139       | 4.30%       | 25,236                                 | 1170      | 4.43%       | 245,080                                | 6885      | 2.73%       |
|                                                                   |                |           |             |                                        |           |             |                                        |           |             |
| <b>Regional and remote areas of Victoria</b>                      |                |           |             |                                        |           |             |                                        |           |             |
| Baseline                                                          | 1,347          |           |             | 11,123                                 |           |             | 113,096                                |           |             |



|                                                                   |       |     |        |        |     |        |         |       |        |
|-------------------------------------------------------------------|-------|-----|--------|--------|-----|--------|---------|-------|--------|
| a. Awareness campaigns                                            | 1,357 | -10 | -0.74% | 11,197 | -74 | -0.67% | 122,000 | -8904 | -7.87% |
| b. Education programs                                             | 1,346 | 1   | 0.07%  | 11,102 | 21  | 0.19%  | 113,007 | 89    | 0.08%  |
| c. Jobs creation programs until 2024                              | 1,337 | 10  | 0.74%  | 11,031 | 92  | 0.83%  | 112,579 | 517   | 0.46%  |
| d. Post-suicide attempt care starting in Jan 2022                 | 1,312 | 35  | 2.60%  | 10,836 | 287 | 2.58%  | 112,797 | 299   | 0.26%  |
| e. Post-suicide attempt care starting in Jan 2023                 | 1,327 | 20  | 1.48%  | 10,957 | 166 | 1.49%  | 112,923 | 173   | 0.15%  |
| f. Post-suicide attempt care starting in Jan 2024                 | 1,339 | 8   | 0.59%  | 11,059 | 64  | 0.58%  | 113,029 | 67    | 0.06%  |
| g. Services capacity increase by 100% and technology-enabled care | 1,336 | 11  | 0.82%  | 11,042 | 81  | 0.73%  | 110,940 | 2156  | 1.91%  |
| h. Interventions b, c, d, g                                       | 1,289 | 58  | 4.31%  | 10,642 | 481 | 4.32%  | 109,921 | 3175  | 2.81%  |
|                                                                   |       |     |        |        |     |        |         |       |        |
| <b>Population aged 15-24 years</b>                                |       |     |        |        |     |        |         |       |        |
| Baseline                                                          | 602   |     |        | 11,611 |     |        | 77,012  |       |        |
| a. Awareness campaigns                                            | 602   | 0   | 0.00%  | 11,616 | -5  | -0.04% | 81,884  | -4872 | -6.33% |
| b. Education programs                                             | 597   | 5   | 0.83%  | 11,518 | 93  | 0.80%  | 76,618  | 394   | 0.51%  |
| c. Jobs creation programs until 2024                              | 596   | 6   | 1.00%  | 11,491 | 120 | 1.03%  | 76,540  | 472   | 0.61%  |
| d. Post-suicide attempt care starting in Jan 2022                 | 587   | 15  | 2.49%  | 11,323 | 288 | 2.48%  | 76,701  | 311   | 0.40%  |
| e. Post-suicide attempt care starting in Jan 2023                 | 593   | 9   | 1.50%  | 11,443 | 168 | 1.45%  | 76,831  | 181   | 0.24%  |
| f. Post-suicide attempt care starting in Jan 2024                 | 599   | 3   | 0.50%  | 11,546 | 65  | 0.56%  | 76,941  | 71    | 0.09%  |
| g. Services capacity increase by 100% and technology-enabled care | 599   | 3   | 0.50%  | 11,560 | 51  | 0.44%  | 76,088  | 924   | 1.20%  |
| h. Interventions b, c, d and e combined                           | 573   | 29  | 4.82%  | 11,060 | 551 | 4.75%  | 74,816  | 2196  | 2.85%  |

**Supplementary Table S3. Summary statistics for the projected reductions in cumulative adverse mental health events between March 2020 and March 2026 from the sensitivity analysis.**

|                                                                   | Suicide deaths |       |                       | Intentional self-harm hospitalisations |       |                       | Mental-health related ED presentations |       |                       |
|-------------------------------------------------------------------|----------------|-------|-----------------------|----------------------------------------|-------|-----------------------|----------------------------------------|-------|-----------------------|
|                                                                   | Min            | Max   | Median (95% Interval) | Min                                    | Max   | Median (95% Interval) | Min                                    | Max   | Median (95% Interval) |
| <b>Victoria</b>                                                   |                |       |                       |                                        |       |                       |                                        |       |                       |
| a. Awareness campaigns                                            | -0.62          | -0.4  | -0.52 (-0.62, -0.41)  | -0.57                                  | -0.37 | -0.47 (-0.56, -0.37)  | -8.89                                  | -6.16 | -7.57 (-8.83, -6.23)  |
| b. Education programs                                             | 0.09           | 0.13  | 0.11 (0.09, 0.13)     | 0.21                                   | 0.3   | 0.26 (0.21, 0.29)     | 0.09                                   | 0.13  | 0.11 (0.09, 0.12)     |
| c. Jobs creation programs until 2024                              | 0.53           | 0.86  | 0.73 (0.54, 0.86)     | 0.6                                    | 0.99  | 0.83 (0.61, 0.98)     | 0.34                                   | 0.56  | 0.47 (0.35, 0.55)     |
| d. Post-suicide attempt care starting in Jan 2022                 | 2.15           | 3.16  | 2.66 (2.18, 3.14)     | 2.11                                   | 3.1   | 2.61 (2.14, 3.08)     | 0.22                                   | 0.33  | 0.28 (0.23, 0.32)     |
| e. Post-suicide attempt care starting in Jan 2023                 | 1.25           | 1.84  | 1.54 (1.26, 1.82)     | 1.22                                   | 1.8   | 1.51 (1.24, 1.79)     | 0.13                                   | 0.19  | 0.16 (0.13, 0.19)     |
| f. Post-suicide attempt care starting in Jan 2024                 | 0.48           | 0.72  | 0.6 (0.49, 0.71)      | 0.47                                   | 0.7   | 0.59 (0.48, 0.7)      | 0.05                                   | 0.07  | 0.06 (0.05, 0.07)     |
| g. Services capacity increase by 100% and technology-enabled care | 0.63           | 0.91  | 0.78 (0.66, 0.88)     | 0.57                                   | 0.8   | 0.69 (0.59, 0.78)     | 1.47                                   | 2.1   | 1.81 (1.55, 2.02)     |
| h. Interventions b, c, d, g                                       | 3.61           | 4.94  | 4.24 (3.7, 4.83)      | 3.74                                   | 5.04  | 4.35 (3.78, 4.92)     | 2.37                                   | 3.11  | 2.73 (2.42, 3.05)     |
|                                                                   |                |       |                       |                                        |       |                       |                                        |       |                       |
| <b>Major cities areas of Victoria</b>                             |                |       |                       |                                        |       |                       |                                        |       |                       |
| a. Awareness campaigns                                            | -0.53          | -0.31 | -0.42 (-0.52, -0.32)  | -0.48                                  | -0.29 | -0.39 (-0.48, -0.29)  | -8.77                                  | -6.01 | -7.43 (-8.7, -6.09)   |
| b. Education programs                                             | 0.1            | 0.14  | 0.12 (0.1, 0.14)      | 0.24                                   | 0.33  | 0.28 (0.24, 0.33)     | 0.1                                    | 0.14  | 0.12 (0.1, 0.14)      |
| c. Jobs creation programs until 2024                              | 0.53           | 0.86  | 0.72 (0.54, 0.85)     | 0.6                                    | 0.99  | 0.83 (0.61, 0.98)     | 0.34                                   | 0.56  | 0.47 (0.35, 0.56)     |
| d. Post-suicide attempt care starting in Jan 2022                 | 2.17           | 3.18  | 2.68 (2.19, 3.15)     | 2.13                                   | 3.12  | 2.63 (2.15, 3.09)     | 0.23                                   | 0.33  | 0.28 (0.23, 0.33)     |
| e. Post-suicide attempt care starting in Jan 2023                 | 1.26           | 1.85  | 1.56 (1.27, 1.84)     | 1.23                                   | 1.82  | 1.53 (1.25, 1.8)      | 0.13                                   | 0.19  | 0.16 (0.13, 0.19)     |
| f. Post-suicide attempt care starting in Jan 2024                 | 0.49           | 0.72  | 0.61 (0.49, 0.72)     | 0.48                                   | 0.71  | 0.59 (0.48, 0.7)      | 0.05                                   | 0.08  | 0.06 (0.05, 0.08)     |
| g. Services capacity increase by 100% and technology-enabled care | 0.6            | 0.9   | 0.76 (0.63, 0.88)     | 0.54                                   | 0.8   | 0.68 (0.56, 0.78)     | 1.4                                    | 2.06  | 1.75 (1.46, 2.02)     |
| h. Interventions b, c, d, g                                       | 3.61           | 4.95  | 4.25 (3.69, 4.85)     | 3.76                                   | 5.08  | 4.37 (3.79, 4.98)     | 2.32                                   | 3.14  | 2.72 (2.36, 3.04)     |
|                                                                   |                |       |                       |                                        |       |                       |                                        |       |                       |
| <b>Regional and remote areas of Victoria</b>                      |                |       |                       |                                        |       |                       |                                        |       |                       |
| a. Awareness campaigns                                            | -0.85          | -0.62 | -0.74 (-0.85, -0.63)  | -0.77                                  | -0.56 | -0.67 (-0.77, -0.57)  | -9.18                                  | -6.48 | -7.87 (-9.11, -6.56)  |
| b. Education programs                                             | 0.07           | 0.1   | 0.08 (0.07, 0.1)      | 0.16                                   | 0.22  | 0.19 (0.16, 0.22)     | 0.06                                   | 0.09  | 0.08 (0.07, 0.09)     |
| c. Jobs creation programs until 2024                              | 0.54           | 0.87  | 0.74 (0.55, 0.87)     | 0.6                                    | 0.98  | 0.82 (0.61, 0.97)     | 0.33                                   | 0.54  | 0.46 (0.34, 0.54)     |
| d. Post-suicide attempt care starting in Jan 2022                 | 2.13           | 3.12  | 2.63 (2.15, 3.1)      | 2.09                                   | 3.06  | 2.58 (2.11, 3.04)     | 0.22                                   | 0.31  | 0.26 (0.22, 0.31)     |
| e. Post-suicide attempt care starting in Jan 2023                 | 1.22           | 1.8   | 1.51 (1.24, 1.79)     | 1.2                                    | 1.77  | 1.49 (1.22, 1.75)     | 0.12                                   | 0.18  | 0.15 (0.13, 0.18)     |
| f. Post-suicide attempt care starting in Jan 2024                 | 0.47           | 0.7   | 0.58 (0.48, 0.69)     | 0.46                                   | 0.68  | 0.57 (0.47, 0.68)     | 0.05                                   | 0.07  | 0.06 (0.05, 0.07)     |
| g. Services capacity increase by 100% and technology-enabled care | 0.7            | 0.93  | 0.81 (0.72, 0.9)      | 0.61                                   | 0.82  | 0.71 (0.64, 0.79)     | 1.63                                   | 2.17  | 1.88 (1.68, 2.08)     |

|                                                                   |       |       |                      |       |       |                      |       |       |                      |
|-------------------------------------------------------------------|-------|-------|----------------------|-------|-------|----------------------|-------|-------|----------------------|
| gy-enabled care                                                   |       |       |                      |       |       |                      |       |       |                      |
| h. Interventions b, c, d, g                                       | 3.62  | 4.92  | 4.22 (3.73, 4.77)    | 3.68  | 4.94  | 4.26 (3.75, 4.81)    | 2.43  | 3.09  | 2.79 (2.5, 3.04)     |
|                                                                   |       |       |                      |       |       |                      |       |       |                      |
| <b>Population aged 15-24 years</b>                                |       |       |                      |       |       |                      |       |       |                      |
| a. Awareness campaigns                                            | -0.08 | -0.01 | -0.05 (-0.08, -0.02) | -0.08 | -0.01 | -0.05 (-0.08, -0.02) | -7.49 | -5.12 | -6.33 (-7.43, -5.18) |
| b. Education programs                                             | 0.66  | 0.93  | 0.8 (0.67, 0.92)     | 0.66  | 0.93  | 0.8 (0.67, 0.92)     | 0.42  | 0.59  | 0.51 (0.43, 0.59)    |
| c. Jobs creation programs until 2024                              | 0.75  | 1.24  | 1.03 (0.76, 1.23)    | 0.75  | 1.24  | 1.03 (0.76, 1.23)    | 0.44  | 0.74  | 0.61 (0.45, 0.73)    |
| d. Post-suicide attempt care starting in Jan 2022                 | 2.01  | 2.95  | 2.48 (2.03, 2.92)    | 2.01  | 2.95  | 2.48 (2.03, 2.93)    | 0.33  | 0.47  | 0.4 (0.34, 0.47)     |
| e. Post-suicide attempt care starting in Jan 2023                 | 1.17  | 1.72  | 1.44 (1.18, 1.7)     | 1.17  | 1.72  | 1.44 (1.18, 1.7)     | 0.19  | 0.28  | 0.23 (0.2, 0.27)     |
| f. Post-suicide attempt care starting in Jan 2024                 | 0.45  | 0.67  | 0.56 (0.46, 0.67)    | 0.46  | 0.67  | 0.56 (0.46, 0.67)    | 0.08  | 0.11  | 0.09 (0.08, 0.11)    |
| g. Services capacity increase by 100% and technology-enabled care | 0.37  | 0.5   | 0.43 (0.39, 0.49)    | 0.37  | 0.5   | 0.43 (0.39, 0.49)    | 1.01  | 1.37  | 1.18 (1.06, 1.34)    |
| h. Interventions b, c, d, g                                       | 4.04  | 5.38  | 4.72 (4.11, 5.26)    | 4.04  | 5.38  | 4.72 (4.11, 5.26)    | 2.53  | 3.15  | 2.84 (2.56, 3.11)    |

**Supplementary Table S4. Numerical inputs and data sources. Inputs highlighted in blue were varied in the sensitivity analysis.**

| Input                        | Stratification                                   | Value         | Notes                                                                                             |
|------------------------------|--------------------------------------------------|---------------|---------------------------------------------------------------------------------------------------|
| <b>Population</b>            |                                                  |               |                                                                                                   |
| Birth rate increase per year | Major cities areas                               | 0.000005712   | Estimated via constrained optimisation                                                            |
|                              | Regional and remote areas                        | 0.000020414   | Estimated via constrained optimisation                                                            |
| Birth rate per year initial  | Major cities areas                               | 0.013611169   | Estimated via constrained optimisation                                                            |
|                              | Regional and remote areas                        | 0.011434248   | Estimated via constrained optimisation                                                            |
| Death rate increase per year | Major cities areas                               | -0.000100598  | Estimated via constrained optimisation                                                            |
|                              | Regional and remote areas                        | -0.000087563  | Estimated via constrained optimisation                                                            |
| Death rate per year initial  | Major cities areas                               | 0.005956262   | Estimated via constrained optimisation                                                            |
|                              | Regional and remote areas                        | 0.006691312   | Estimated via constrained optimisation                                                            |
| Death rate ratio             | Age 0-14 years                                   | 0.049953490   | Estimated via constrained optimisation                                                            |
|                              | Age 15-24 years                                  | 0.049994405   | Estimated via constrained optimisation                                                            |
|                              | Age 25-44 years                                  | 0.119292062   | Estimated via constrained optimisation                                                            |
|                              | Age 45-64 years                                  | 0.564924026   | Estimated via constrained optimisation                                                            |
|                              | Age 65 years and over                            | 6.150733653   | Estimated via constrained optimisation                                                            |
| Internal arrivals            | Age 0-14 years, Major cities areas               | 236.722197299 | Estimated via constrained optimisation                                                            |
|                              | Age 0-14 years, Regional and remote areas        | 188.098055176 | Estimated via constrained optimisation                                                            |
|                              | Age 15-24 years, Major cities areas              | 319.900385822 | Estimated via constrained optimisation                                                            |
|                              | Age 15-24 years, Regional and remote areas       | 177.102653874 | Estimated via constrained optimisation                                                            |
|                              | Age 25-44 years, Major cities areas              | 594.261776421 | Estimated via constrained optimisation                                                            |
|                              | Age 25-44 years, Regional and remote areas       | 339.697856644 | Estimated via constrained optimisation                                                            |
|                              | Age 45-64 years, Major cities areas              | 184.427927268 | Estimated via constrained optimisation                                                            |
|                              | Age 45-64 years, Regional and remote areas       | 179.441348232 | Estimated via constrained optimisation                                                            |
|                              | Age 65 years and over, Major cities areas        | 61.879153446  | Estimated via constrained optimisation                                                            |
| Pre-COVID overseas arrivals  | Age 65 years and over, Regional and remote areas | 61.325651873  | Estimated via constrained optimisation                                                            |
|                              | Age 0-14 years, Major cities areas               | 290.013403688 | Estimated via constrained optimisation                                                            |
|                              | Age 0-14 years, Regional and remote areas        | 103.020522778 | Estimated via constrained optimisation                                                            |
|                              | Age 15-24 years, Major cities areas              | 396.209231260 | Estimated via constrained optimisation                                                            |
|                              | Age 15-24 years, Regional and remote areas       | 221.984420299 | Estimated via constrained optimisation                                                            |
|                              | Age 25-44 years, Major cities areas              | 862.838086731 | Estimated via constrained optimisation                                                            |
|                              | Age 25-44 years, Regional and remote areas       | 402.522889841 | Estimated via constrained optimisation                                                            |
|                              | Age 45-64 years, Major cities areas              | 142.038863930 | Estimated via constrained optimisation                                                            |
|                              | Age 45-64 years, Regional and remote areas       | 110.785701628 | Estimated via constrained optimisation                                                            |
| Internal departure rate      | Age 65 years and over, Major cities areas        | 30.651413734  | Estimated via constrained optimisation                                                            |
|                              | Age 65 years and over, Regional and remote areas | 21.549141586  | Estimated via constrained optimisation                                                            |
|                              | Age 0-14 years, Major cities areas               | 0.014912808   | Estimated via constrained optimisation                                                            |
|                              | Age 0-14 years, Regional and remote areas        | 0.029738236   | Estimated via constrained optimisation                                                            |
|                              | Age 15-24 years, Major cities areas              | 0.020253292   | Estimated via constrained optimisation                                                            |
|                              | Age 15-24 years, Regional and remote areas       | 0.071824078   | Estimated via constrained optimisation                                                            |
|                              | Age 25-44 years, Major cities areas              | 0.020077473   | Estimated via constrained optimisation                                                            |
|                              | Age 25-44 years, Regional and remote areas       | 0.051505974   | Estimated via constrained optimisation                                                            |
|                              | Age 45-64 years, Major cities areas              | 0.011143052   | Estimated via constrained optimisation                                                            |
| Overseas departure rate      | Age 45-64 years, Regional and remote areas       | 0.017048666   | Estimated via constrained optimisation                                                            |
|                              | Age 65 years and over, Major cities areas        | 0.012961140   | Estimated via constrained optimisation                                                            |
|                              | Age 65 years and over, Regional and remote areas | 0.010889263   | Estimated via constrained optimisation                                                            |
|                              | Age 0-14 years, Major cities areas               | 0.003698448   | Estimated via constrained optimisation                                                            |
|                              | Age 0-14 years, Regional and remote areas        | 0.018402611   | Estimated via constrained optimisation                                                            |
|                              | Age 15-24 years, Major cities areas              | 0.008809918   | Estimated via constrained optimisation                                                            |
|                              | Age 15-24 years, Regional and remote areas       | 0.054567510   | Estimated via constrained optimisation                                                            |
|                              | Age 25-44 years, Major cities areas              | 0.007092600   | Estimated via constrained optimisation                                                            |
|                              | Age 25-44 years, Regional and remote areas       | 0.065991037   | Estimated via constrained optimisation                                                            |
| Population initial           | Age 45-64 years, Major cities areas              | 0.004423970   | Estimated via constrained optimisation                                                            |
|                              | Age 45-64 years, Regional and remote areas       | 0.005838317   | Estimated via constrained optimisation                                                            |
|                              | Age 65 years and over, Major cities areas        | 0.002175795   | Estimated via constrained optimisation                                                            |
|                              | Age 65 years and over, Regional and remote areas | 0.004545667   | Estimated via constrained optimisation                                                            |
|                              | Age 0-14 years, Major cities areas               | 760712.8159   | Derived from Australian Bureau of Statistics, Estimated Resident Population by SA2 by Sex and Age |
|                              | Age 0-14 years, Regional and remote areas        | 249152.6793   | Derived from Australian Bureau of Statistics,                                                     |

|                                                                  |                                                  |              |                                                                                                                                                                                                                                      |
|------------------------------------------------------------------|--------------------------------------------------|--------------|--------------------------------------------------------------------------------------------------------------------------------------------------------------------------------------------------------------------------------------|
|                                                                  |                                                  |              | Estimated Resident Population by SA2 by Sex and Age                                                                                                                                                                                  |
|                                                                  | Age 15-24 years, Major cities areas              | 600793.9979  | Derived from Australian Bureau of Statistics, Estimated Resident Population by SA2 by Sex and Age                                                                                                                                    |
|                                                                  | Age 15-24 years, Regional and remote areas       | 167914.9989  | Derived from Australian Bureau of Statistics, Estimated Resident Population by SA2 by Sex and Age                                                                                                                                    |
|                                                                  | Age 25-44 years, Major cities areas              | 1289942.4090 | Derived from Australian Bureau of Statistics, Estimated Resident Population by SA2 by Sex and Age                                                                                                                                    |
|                                                                  | Age 25-44 years, Regional and remote areas       | 309372.5856  | Derived from Australian Bureau of Statistics, Estimated Resident Population by SA2 by Sex and Age                                                                                                                                    |
|                                                                  | Age 45-64 years, Major cities areas              | 1002741.2260 | Derived from Australian Bureau of Statistics, Estimated Resident Population by SA2 by Sex and Age                                                                                                                                    |
|                                                                  | Age 45-64 years, Regional and remote areas       | 353081.2664  | Derived from Australian Bureau of Statistics, Estimated Resident Population by SA2 by Sex and Age                                                                                                                                    |
|                                                                  | Age 65 years and over, Major cities areas        | 546275.3634  | Derived from Australian Bureau of Statistics, Estimated Resident Population by SA2 by Sex and Age                                                                                                                                    |
|                                                                  | Age 65 years and over, Regional and remote areas | 219471.6320  | Derived from Australian Bureau of Statistics, Estimated Resident Population by SA2 by Sex and Age                                                                                                                                    |
| <b>Psychological distress</b>                                    |                                                  |              |                                                                                                                                                                                                                                      |
| Psychological distress onset base rate                           | Age 15-24 years, Major cities areas              | 0.140960248  | Estimated via constrained optimisation                                                                                                                                                                                               |
|                                                                  | Age 15-24 years, Regional and remote areas       | 0.141305836  | Estimated via constrained optimisation                                                                                                                                                                                               |
|                                                                  | Age 25-44 years, Major cities areas              | 0.092380075  | Estimated via constrained optimisation                                                                                                                                                                                               |
|                                                                  | Age 25-44 years, Regional and remote areas       | 0.091426952  | Estimated via constrained optimisation                                                                                                                                                                                               |
|                                                                  | Age 45-64 years, Major cities areas              | 0.084192614  | Estimated via constrained optimisation                                                                                                                                                                                               |
|                                                                  | Age 45-64 years, Regional and remote areas       | 0.079497591  | Estimated via constrained optimisation                                                                                                                                                                                               |
|                                                                  | Age 65 years and over, Major cities areas        | 0.067190060  | Estimated via constrained optimisation                                                                                                                                                                                               |
|                                                                  | Age 65 years and over, Regional and remote areas | 0.066267902  | Estimated via constrained optimisation                                                                                                                                                                                               |
| Psychological distress prevalence initial                        | Age 15-24 years, Major cities areas              | 0.369397785  | Estimated via constrained optimisation                                                                                                                                                                                               |
|                                                                  | Age 15-24 years, Regional and remote areas       | 0.362954019  | Estimated via constrained optimisation                                                                                                                                                                                               |
|                                                                  | Age 25-44 years, Major cities areas              | 0.283263589  | Estimated via constrained optimisation                                                                                                                                                                                               |
|                                                                  | Age 25-44 years, Regional and remote areas       | 0.280001814  | Estimated via constrained optimisation                                                                                                                                                                                               |
|                                                                  | Age 45-64 years, Major cities areas              | 0.270740469  | Estimated via constrained optimisation                                                                                                                                                                                               |
|                                                                  | Age 45-64 years, Regional and remote areas       | 0.268794539  | Estimated via constrained optimisation                                                                                                                                                                                               |
|                                                                  | Age 65 years and over, Major cities areas        | 0.199438926  | Estimated via constrained optimisation                                                                                                                                                                                               |
|                                                                  | Age 65 years and over, Regional and remote areas | 0.199227962  | Estimated via constrained optimisation                                                                                                                                                                                               |
| Effect of unemployment on psychological distress                 |                                                  | 1.732936000  | Derived from Australian Bureau of Statistics (2012, Information paper. Use of the Kessler psychological distress scale in ABS health surveys, Australia, 2007-08. Cat. no. 4817.0.55.001. Australian Bureau of Statistics, Canberra) |
| Unemployment rate ratio non-distressed                           |                                                  | 0.696177000  | Derived from Australian Bureau of Statistics (2012, Information paper. Use of the Kessler psychological distress scale in ABS health surveys, Australia, 2007-08. Cat. no. 4817.0.55.001. Australian Bureau of Statistics, Canberra) |
| Effect of underemployment on psychological distress              |                                                  | 1.132448000  | Derived from Dooley et al. (2000, J. Health Soc. Behav. 41, 421-436)                                                                                                                                                                 |
| Underemployment rate ratio non-distressed                        |                                                  | 0.975887900  | Derived from Dooley et al. (2000, J. Health Soc. Behav. 41, 421-436)                                                                                                                                                                 |
| Effect of psychopathological vulnerability on distress onset     |                                                  | 1.95         | Derived from Green et al. (2019, Aust. N. Z. J. Psychiatry 53, 304-315)                                                                                                                                                              |
| Psychopathological vulnerability prevalence ratio non-distressed |                                                  | 0.918356100  | Derived from Green et al. (2019, Aust. N. Z. J. Psychiatry 53, 304-315)                                                                                                                                                              |
| Migrant psychological distress prevalence ratio                  |                                                  | 0.798851123  | Australian Bureau of Statistics (2018, National Health Survey: first results, 2017-18. Cat. no. 4364.0.55.001. Australian Bureau of Statistics, Canberra)                                                                            |
| <b>Psychopathological vulnerability</b>                          |                                                  |              |                                                                                                                                                                                                                                      |
| Developing psychopathological vulnerability base rate            | Age 0-14 years, Major cities areas               | 0.009010741  | Estimated via constrained optimisation                                                                                                                                                                                               |

|                                                                                 |                                            |             |                                                                                                               |
|---------------------------------------------------------------------------------|--------------------------------------------|-------------|---------------------------------------------------------------------------------------------------------------|
|                                                                                 | Age 0-14 years, Regional and remote areas  | 0.007094532 | Estimated via constrained optimisation                                                                        |
| Psychopathological vulnerability prevalence initial                             | Major cities areas                         | 0.094140212 | Estimated via constrained optimisation                                                                        |
|                                                                                 | Regional and remote areas                  | 0.093142710 | Estimated via constrained optimisation                                                                        |
| Effect of parental psychological distress on vulnerability                      | Age 0-14 years                             | 1.63        | Derived from Dean et al. (2018, Psychol. Med. 48, 2257-2263)                                                  |
| Parental psychological distress prevalence ratio not vulnerable                 | Age 0-14 years                             | 0.947830700 | Derived from Dean et al. (2018, Psychol. Med. 48, 2257-2263)                                                  |
| Proportion of population with dependent children                                | Age 15-24 years                            | 0.043867662 | Derived from Australian Bureau of Statistics. Family Characteristics and Transitions, Australia, 2012-13 data |
|                                                                                 | Age 25-44 years                            | 0.542670616 | Derived from Australian Bureau of Statistics. Family Characteristics and Transitions, Australia, 2012-13 data |
|                                                                                 | Age 45-64 years                            | 0.486845213 | Derived from Australian Bureau of Statistics. Family Characteristics and Transitions, Australia, 2012-13 data |
|                                                                                 | Age 65 years and over                      | 0.178025686 | Derived from Australian Bureau of Statistics. Family Characteristics and Transitions, Australia, 2012-13 data |
| <b>Education</b>                                                                |                                            |             |                                                                                                               |
| Discontinuing post-secondary study base rate                                    | Age 15-24 years                            | 0.514843220 | Estimated via constrained optimisation                                                                        |
|                                                                                 | Age 25-44 years                            | 0.355353608 | Estimated via constrained optimisation                                                                        |
|                                                                                 | Age 45-64 years                            | 0.914640795 | Estimated via constrained optimisation                                                                        |
| Proportion completing first post-secondary qualification                        | Age 15-24 years, Major cities areas        | 0.392435240 | Estimated via constrained optimisation                                                                        |
|                                                                                 | Age 15-24 years, Regional and remote areas | 0.298072867 | Estimated via constrained optimisation                                                                        |
|                                                                                 | Age 25-44 years, Major cities areas        | 0.331762633 | Estimated via constrained optimisation                                                                        |
|                                                                                 | Age 25-44 years, Regional and remote areas | 0.133087607 | Estimated via constrained optimisation                                                                        |
|                                                                                 | Age 45-64 years, Major cities areas        | 0.060440367 | Estimated via constrained optimisation                                                                        |
|                                                                                 | Age 45-64 years, Regional and remote areas | 0.039834123 | Estimated via constrained optimisation                                                                        |
| Starting post-secondary study base rate                                         | Age 15-24 years, Major cities areas        | 0.611637308 | Estimated via constrained optimisation                                                                        |
|                                                                                 | Age 15-24 years, Regional and remote areas | 0.417709602 | Estimated via constrained optimisation                                                                        |
|                                                                                 | Age 25-44 years, Major cities areas        | 0.098383705 | Estimated via constrained optimisation                                                                        |
|                                                                                 | Age 25-44 years, Regional and remote areas | 0.135948492 | Estimated via constrained optimisation                                                                        |
|                                                                                 | Age 45-64 years, Major cities areas        | 0.048422416 | Estimated via constrained optimisation                                                                        |
|                                                                                 | Age 45-64 years, Regional and remote areas | 0.078282317 | Estimated via constrained optimisation                                                                        |
| Post-secondary study proportion initial                                         | Age 15-24 years, Major cities areas        | 0.355115423 | Derived from Australian Bureau of Statistics, Education and Work 2019                                         |
|                                                                                 | Age 15-24 years, Regional and remote areas | 0.202388926 | Derived from Australian Bureau of Statistics, Education and Work 2019                                         |
|                                                                                 | Age 25-44 years, Major cities areas        | 0.111649431 | Derived from Australian Bureau of Statistics, Education and Work 2019                                         |
|                                                                                 | Age 25-44 years, Regional and remote areas | 0.096690348 | Derived from Australian Bureau of Statistics, Education and Work 2019                                         |
|                                                                                 | Age 45-64 years, Major cities areas        | 0.034433726 | Derived from Australian Bureau of Statistics, Education and Work 2019                                         |
|                                                                                 | Age 45-64 years, Regional and remote areas | 0.039115740 | Derived from Australian Bureau of Statistics, Education and Work 2019                                         |
| Post-secondary qualification proportion initial                                 | Age 15-24 years, Major cities areas        | 0.220696711 | Derived from Australian Bureau of Statistics, Education and Work 2019                                         |
|                                                                                 | Age 15-24 years, Regional and remote areas | 0.182269013 | Derived from Australian Bureau of Statistics, Education and Work 2019                                         |
|                                                                                 | Age 25-44 years, Major cities areas        | 0.654297384 | Derived from Australian Bureau of Statistics, Education and Work 2019                                         |
|                                                                                 | Age 25-44 years, Regional and remote areas | 0.544850690 | Derived from Australian Bureau of Statistics, Education and Work 2019                                         |
|                                                                                 | Age 45-64 years, Major cities areas        | 0.538839012 | Derived from Australian Bureau of Statistics, Education and Work 2019                                         |
|                                                                                 | Age 45-64 years, Regional and remote areas | 0.477588786 | Derived from Australian Bureau of Statistics, Education and Work 2019                                         |
| Death rate ratio post-secondary qualification                                   |                                            | 0.735294118 | Derived from Backlund et al. (1999, Soc. Sci. Med. 49, 1373-1384)                                             |
| Migrant post-secondary qualification probability ratio                          |                                            | 1.075613702 | Derived from Australian Bureau of Statistics, Migrants, Education and Work 2019                               |
| Effect of psychological distress on post-secondary education                    |                                            | 0.833333300 | Derived from Lee et al. (2009, Br. J. Psychiatry 194, 411-417)                                                |
| Effect of psychological distress on discontinuation of post-secondary education |                                            | 1.1         | Derived from Lee et al. (2009, Br. J. Psychiatry 194, 411-417)                                                |

| <b>Employment</b>                                |                                            |             |                                                                            |
|--------------------------------------------------|--------------------------------------------|-------------|----------------------------------------------------------------------------|
| Employed to NILF base rate                       | Age 15-24 years                            | 0.230345489 | Estimated via constrained optimisation                                     |
|                                                  | Age 25-44 years                            | 0.028621158 | Estimated via constrained optimisation                                     |
|                                                  | Age 45-64 years                            | 0.029305930 | Estimated via constrained optimisation                                     |
| Employed to underemployed base rate              | Age 15-24 years                            | 0.000000000 | Estimated via constrained optimisation                                     |
|                                                  | Age 25-44 years                            | 0.341915821 | Estimated via constrained optimisation                                     |
|                                                  | Age 45-64 years                            | 0.365477832 | Estimated via constrained optimisation                                     |
| Employed to unemployed base rate                 | Age 15-24 years                            | 0.169541615 | Estimated via constrained optimisation                                     |
|                                                  | Age 25-44 years                            | 0.057248722 | Estimated via constrained optimisation                                     |
|                                                  | Age 45-64 years                            | 0.055423857 | Estimated via constrained optimisation                                     |
| NILF to unemployed base rate                     | Age 15-24 years, Major cities areas        | 0.605087967 | Estimated via constrained optimisation                                     |
|                                                  | Age 15-24 years, Regional and remote areas | 0.795900232 | Estimated via constrained optimisation                                     |
|                                                  | Age 25-44 years, Major cities areas        | 0.288692216 | Estimated via constrained optimisation                                     |
|                                                  | Age 25-44 years, Regional and remote areas | 0.215008522 | Estimated via constrained optimisation                                     |
|                                                  | Age 45-64 years, Major cities areas        | 0.081843686 | Estimated via constrained optimisation                                     |
|                                                  | Age 45-64 years, Regional and remote areas | 0.082773834 | Estimated via constrained optimisation                                     |
| Underemployed to employed base rate              | Age 15-24 years                            | 1.806575267 | Estimated via constrained optimisation                                     |
|                                                  | Age 25-44 years                            | 3.463841411 | Estimated via constrained optimisation                                     |
|                                                  | Age 45-64 years                            | 4.247287747 | Estimated via constrained optimisation                                     |
| Underemployed to NILF base rate                  | Age 15-24 years                            | 0.000025982 | Estimated via constrained optimisation                                     |
|                                                  | Age 25-44 years                            | 0.185647422 | Estimated via constrained optimisation                                     |
|                                                  | Age 45-64 years                            | 0.032387103 | Estimated via constrained optimisation                                     |
| Underemployed to unemployed base rate            | Age 15-24 years                            | 0.034161371 | Estimated via constrained optimisation                                     |
|                                                  | Age 25-44 years                            | 0.414877792 | Estimated via constrained optimisation                                     |
|                                                  | Age 45-64 years                            | 0.194671165 | Estimated via constrained optimisation                                     |
| Unemployed to employed base rate                 | Age 15-24 years, Major cities areas        | 0.058392399 | Estimated via constrained optimisation                                     |
|                                                  | Age 15-24 years, Regional and remote areas | 0.416291772 | Estimated via constrained optimisation                                     |
|                                                  | Age 25-44 years, Major cities areas        | 2.928028494 | Estimated via constrained optimisation                                     |
|                                                  | Age 25-44 years, Regional and remote areas | 2.357894110 | Estimated via constrained optimisation                                     |
|                                                  | Age 45-64 years, Major cities areas        | 2.176342869 | Estimated via constrained optimisation                                     |
|                                                  | Age 45-64 years, Regional and remote areas | 1.421868847 | Estimated via constrained optimisation                                     |
| Unemployed to NILF base rate                     | Age 15-24 years                            | 3.045387470 | Estimated via constrained optimisation                                     |
|                                                  | Age 25-44 years                            | 2.163056957 | Estimated via constrained optimisation                                     |
|                                                  | Age 45-64 years                            | 2.128404168 | Estimated via constrained optimisation                                     |
| Unemployed to NILF rate coefficient unemployment | Age 15-24 years                            | 1.663855685 | Estimated via constrained optimisation                                     |
|                                                  | Age 25-44 years                            | 1.148233134 | Estimated via constrained optimisation                                     |
|                                                  | Age 45-64 years                            | 1.018995294 | Estimated via constrained optimisation                                     |
| Unemployed to underemployed base rate            | Age 15-24 years, Major cities areas        | 2.938718004 | Estimated via constrained optimisation                                     |
|                                                  | Age 15-24 years, Regional and remote areas | 3.405752801 | Estimated via constrained optimisation                                     |
|                                                  | Age 25-44 years, Major cities areas        | 0.082738738 | Estimated via constrained optimisation                                     |
|                                                  | Age 25-44 years, Regional and remote areas | 0.902704996 | Estimated via constrained optimisation                                     |
|                                                  | Age 45-64 years, Major cities areas        | 0.204494788 | Estimated via constrained optimisation                                     |
|                                                  | Age 45-64 years, Regional and remote areas | 1.232974847 | Estimated via constrained optimisation                                     |
| Employed proportion initial                      | Age 15-24 years, Major cities areas        | 0.616317913 | Derived from Australian Bureau of Statistics, Labour Force, Australia 2019 |
|                                                  | Age 15-24 years, Regional and remote areas | 0.618544508 | Derived from Australian Bureau of Statistics, Labour Force, Australia 2019 |
|                                                  | Age 25-44 years, Major cities areas        | 0.790999868 | Derived from Australian Bureau of Statistics, Labour Force, Australia 2019 |
|                                                  | Age 25-44 years, Regional and remote areas | 0.775968579 | Derived from Australian Bureau of Statistics, Labour Force, Australia 2019 |
|                                                  | Age 45-64 years, Major cities areas        | 0.713404939 | Derived from Australian Bureau of Statistics, Labour Force, Australia 2019 |
|                                                  | Age 45-64 years, Regional and remote areas | 0.695142713 | Derived from Australian Bureau of Statistics, Labour Force, Australia 2019 |
| Unemployed proportion initial                    | Age 15-24 years, Major cities areas        | 0.087697142 | Derived from Australian Bureau of Statistics, Labour Force, Australia 2019 |
|                                                  | Age 15-24 years, Regional and remote areas | 0.095630003 | Derived from Australian Bureau of Statistics, Labour Force, Australia 2019 |
|                                                  | Age 25-44 years, Major cities areas        | 0.033621655 | Derived from Australian Bureau of Statistics, Labour Force, Australia 2019 |
|                                                  | Age 25-44 years, Regional and remote areas | 0.035541734 | Derived from Australian Bureau of Statistics, Labour Force, Australia 2019 |
|                                                  | Age 45-64 years, Major cities areas        | 0.024077597 | Derived from Australian Bureau of Statistics, Labour Force, Australia 2019 |
|                                                  | Age 45-64 years, Regional and remote areas | 0.025003664 | Derived from Australian Bureau of Statistics, Labour Force, Australia 2019 |

|                                                              |                                                  |              |                                                                                                                                                                                                                                    |
|--------------------------------------------------------------|--------------------------------------------------|--------------|------------------------------------------------------------------------------------------------------------------------------------------------------------------------------------------------------------------------------------|
|                                                              |                                                  |              | Labour Force, Australia 2019                                                                                                                                                                                                       |
| Underemployed proportion initial                             | Age 15-24 years                                  | 0.162401338  | Derived from Australian Bureau of Statistics, Labour Force, Australia 2019                                                                                                                                                         |
|                                                              | Age 25-44 years                                  | 0.056678129  | Derived from Australian Bureau of Statistics, Labour Force, Australia 2019                                                                                                                                                         |
|                                                              | Age 45-64 years                                  | 0.058327686  | Derived from Australian Bureau of Statistics, Labour Force, Australia 2019                                                                                                                                                         |
| Migrant underemployment probability ratio                    |                                                  | 0.862288655  | Derived from Wilkins (2006, Aust. J. Labour Econ. 9, 371-393)                                                                                                                                                                      |
| Migrant unemployment probability ratio                       |                                                  | 0.994422716  | Derived from Australian Bureau of Statistics, Labour Force Detailed, Australia 2019                                                                                                                                                |
| Migrant employment probability ratio                         |                                                  | 0.956702207  | Derived from Australian Bureau of Statistics, Labour Force Detailed, Australia 2019                                                                                                                                                |
| Effect of psychological distress on participation            |                                                  | 0.839659600  | Derived from Frijters et al. (2014, Health Econ. 23, 1058-1071)                                                                                                                                                                    |
| Effect of psychological distress on employment               |                                                  | 0.839659600  | Derived from Frijters et al. (2014, Health Econ. 23, 1058-1071)                                                                                                                                                                    |
| Effect of post-secondary education on participation          |                                                  | 1.351342518  | Derived from Australian Bureau of Statistics (2020, Education and work, Australia, May 2020. Cat. no. 6227.0. Australian Bureau of Statistics, Canberra)                                                                           |
| Effect of post-secondary education on employment             |                                                  | 1.046560897  | Derived from Australian Bureau of Statistics (2020, Education and work, Australia, May 2020. Cat. no. 6227.0. Australian Bureau of Statistics, Canberra)                                                                           |
| Death rate ratio unemployed                                  |                                                  | 1.22         | Derived from Sorlie and Rogot (1990, Am. J. Epidemiol. 132, 983-992)                                                                                                                                                               |
| Post-secondary qualification probability ratio NILF          |                                                  | 0.679195716  | Derived from Australian Bureau of Statistics (2020, Education and work, Australia, May 2020. Cat. no. 6227.0. Australian Bureau of Statistics, Canberra)                                                                           |
| Post-secondary qualification probability ratio underemployed |                                                  | 0.862828720  | Derived from Wilkins (2004, The extent and consequences of underemployment in Australia. Melbourne Institute working paper no. 16/04. The University of Melbourne, Melbourne) and Wilkins (2006, Aust. J. Labour Econ. 9, 371-393) |
| Post-secondary study employed proportion ratio               | Age 15-24 years, Major cities areas              | 0.519269670  | Estimated via constrained optimisation                                                                                                                                                                                             |
|                                                              | Age 15-24 years, Regional and remote areas       | 0.766553475  | Estimated via constrained optimisation                                                                                                                                                                                             |
| Unemployed to NILF rate coefficient unemployment             | Age 15-24 years                                  | 1.663855685  | Estimated via constrained optimisation                                                                                                                                                                                             |
|                                                              | Age 25-44 years                                  | 1.148233134  | Estimated via constrained optimisation                                                                                                                                                                                             |
|                                                              | Age 45-64 years                                  | 1.018995294  | Estimated via constrained optimisation                                                                                                                                                                                             |
| Effect of education on underemployed to employed rate        |                                                  | 1.407043821  | Derived from Wilkins (2004, The extent and consequences of underemployment in Australia. Melbourne Institute working paper no. 16/04. The University of Melbourne, Melbourne) and Wilkins (2006, Aust. J. Labour Econ. 9, 371-393) |
| <b>Suicidal behaviour</b>                                    |                                                  |              |                                                                                                                                                                                                                                    |
| Self-harm hospitalisation rate non-distressed                | Age 0-14 years, Major cities areas               | 0.000069607  | Estimated via constrained optimisation                                                                                                                                                                                             |
|                                                              | Age 0-14 years, Regional and remote areas        | 0.000168588  | Estimated via constrained optimisation                                                                                                                                                                                             |
|                                                              | Age 15-24 years, Major cities areas              | 0.000372407  | Estimated via constrained optimisation                                                                                                                                                                                             |
|                                                              | Age 15-24 years, Regional and remote areas       | 0.000675128  | Estimated via constrained optimisation                                                                                                                                                                                             |
|                                                              | Age 25-44 years, Major cities areas              | 0.000226430  | Estimated via constrained optimisation                                                                                                                                                                                             |
|                                                              | Age 25-44 years, Regional and remote areas       | 0.000491479  | Estimated via constrained optimisation                                                                                                                                                                                             |
|                                                              | Age 45-64 years, Major cities areas              | 0.000194368  | Estimated via constrained optimisation                                                                                                                                                                                             |
|                                                              | Age 45-64 years, Regional and remote areas       | 0.000288011  | Estimated via constrained optimisation                                                                                                                                                                                             |
|                                                              | Age 65 years and over, Major cities areas        | 0.000082107  | Estimated via constrained optimisation                                                                                                                                                                                             |
|                                                              | Age 65 years and over, Regional and remote areas | 0.000087650  | Estimated via constrained optimisation                                                                                                                                                                                             |
| Suicide attempt lethality initial                            | Age 0-14 years                                   | 0.021220755  | Estimated via constrained optimisation                                                                                                                                                                                             |
|                                                              | Age 15-24 years                                  | 0.052111011  | Estimated via constrained optimisation                                                                                                                                                                                             |
|                                                              | Age 25-44 years                                  | 0.123474937  | Estimated via constrained optimisation                                                                                                                                                                                             |
|                                                              | Age 45-64 years                                  | 0.168378275  | Estimated via constrained optimisation                                                                                                                                                                                             |
|                                                              | Age 65 years and over                            | 0.358069053  | Estimated via constrained optimisation                                                                                                                                                                                             |
| Suicide attempt lethality multiplier increase per year       |                                                  | -0.000428121 | Estimated via constrained optimisation                                                                                                                                                                                             |
| <b>Services</b>                                              |                                                  |              |                                                                                                                                                                                                                                    |



|                                                             |                           |                 |                                                                                                                                                                                                                                                                                                                                                                |
|-------------------------------------------------------------|---------------------------|-----------------|----------------------------------------------------------------------------------------------------------------------------------------------------------------------------------------------------------------------------------------------------------------------------------------------------------------------------------------------------------------|
| CMHC services capacity increase per year                    | Major cities areas        | 407.303967750   | Estimated via constrained optimisation                                                                                                                                                                                                                                                                                                                         |
|                                                             | Regional and remote areas | 24.449580592    | Estimated via constrained optimisation                                                                                                                                                                                                                                                                                                                         |
| CMHC services capacity initial                              | Major cities areas        | 20170.471290400 | Estimated via constrained optimisation                                                                                                                                                                                                                                                                                                                         |
|                                                             | Regional and remote areas | 8362.132220490  | Estimated via constrained optimisation                                                                                                                                                                                                                                                                                                                         |
| GP services capacity increase per year                      | Major cities areas        | 979.474090885   | Estimated via constrained optimisation                                                                                                                                                                                                                                                                                                                         |
|                                                             | Regional and remote areas | 324.340639919   | Estimated via constrained optimisation                                                                                                                                                                                                                                                                                                                         |
| GP services capacity initial                                | Major cities areas        | 7818.335290520  | Estimated via constrained optimisation                                                                                                                                                                                                                                                                                                                         |
|                                                             | Regional and remote areas | 2961.383353070  | Estimated via constrained optimisation                                                                                                                                                                                                                                                                                                                         |
| Non-specialised hospital capacity increase per year         | Major cities areas        | 9.919428365     | Estimated via constrained optimisation                                                                                                                                                                                                                                                                                                                         |
|                                                             | Regional and remote areas | 1.252002347     | Estimated via constrained optimisation                                                                                                                                                                                                                                                                                                                         |
| Non-specialised hospital capacity initial                   | Major cities areas        | 138.912829802   | Estimated via constrained optimisation                                                                                                                                                                                                                                                                                                                         |
|                                                             | Regional and remote areas | 89.802449675    | Estimated via constrained optimisation                                                                                                                                                                                                                                                                                                                         |
| Private hospital capacity increase per year                 | Major cities areas        | 10.007322791    | Estimated via constrained optimisation                                                                                                                                                                                                                                                                                                                         |
|                                                             | Regional and remote areas | 3.453473891     | Estimated via constrained optimisation                                                                                                                                                                                                                                                                                                                         |
| Private hospital capacity initial                           | Major cities areas        | 141.961220253   | Estimated via constrained optimisation                                                                                                                                                                                                                                                                                                                         |
|                                                             | Regional and remote areas | 59.115084832    | Estimated via constrained optimisation                                                                                                                                                                                                                                                                                                                         |
| Private outpatient services capacity increase per year      | Major cities areas        | 15.273014175    | Estimated via constrained optimisation                                                                                                                                                                                                                                                                                                                         |
|                                                             | Regional and remote areas | 10.146706910    | Estimated via constrained optimisation                                                                                                                                                                                                                                                                                                                         |
| Private outpatient services capacity initial                | Major cities areas        | 1434.729354560  | Estimated via constrained optimisation                                                                                                                                                                                                                                                                                                                         |
|                                                             | Regional and remote areas | 47.552058868    | Estimated via constrained optimisation                                                                                                                                                                                                                                                                                                                         |
| Psychiatric hospital capacity increase per year             | Major cities areas        | 12.718616160    | Estimated via constrained optimisation                                                                                                                                                                                                                                                                                                                         |
|                                                             | Regional and remote areas | 4.928750998     | Estimated via constrained optimisation                                                                                                                                                                                                                                                                                                                         |
| Psychiatric hospital capacity initial                       | Major cities areas        | 229.726659250   | Estimated via constrained optimisation                                                                                                                                                                                                                                                                                                                         |
|                                                             | Regional and remote areas | 83.605232465    | Estimated via constrained optimisation                                                                                                                                                                                                                                                                                                                         |
| Psychiatrist and allied services capacity increase per year | Major cities areas        | 1468.119047610  | Estimated via constrained optimisation                                                                                                                                                                                                                                                                                                                         |
|                                                             | Regional and remote areas | 492.542641723   | Estimated via constrained optimisation                                                                                                                                                                                                                                                                                                                         |
| Psychiatrist and allied services capacity initial           | Major cities areas        | 25683.101715000 | Estimated via constrained optimisation                                                                                                                                                                                                                                                                                                                         |
|                                                             | Regional and remote areas | 6515.546704950  | Estimated via constrained optimisation                                                                                                                                                                                                                                                                                                                         |
| Mean treatment duration non-specialised hospital care       |                           | 0.883845357     | Derived from national data on mental health-related hospitalisations published by the Australian Institute of Health and Welfare (available at: <a href="https://www.aihw.gov.au/reports-data/health-welfare-services/mental-health-services/data">https://www.aihw.gov.au/reports-data/health-welfare-services/mental-health-services/data</a> )              |
| Effect of psychological distress on help seeking            | High distress             | 0.950333300     | Derived from Australian Bureau of Statistics (2012, Information paper. Use of the Kessler psychological distress scale in ABS health surveys, Australia, 2007-08. Cat. no. 4817.0.55.001. Australian Bureau of Statistics, Canberra)                                                                                                                           |
|                                                             | Low distress              | 1               | Reference category                                                                                                                                                                                                                                                                                                                                             |
| Mean treatment duration online services                     |                           | 6               | Derived from Christensen et al. (2004, Br. Med. J. 328, 265)                                                                                                                                                                                                                                                                                                   |
| Referral rate online services                               |                           | 0.046749000     | Derived from national data on mental health-related general practitioner services published by the Australian Institute of Health and Welfare (available at: <a href="https://www.aihw.gov.au/reports-data/health-welfare-services/mental-health-services/data">https://www.aihw.gov.au/reports-data/health-welfare-services/mental-health-services/data</a> ) |
| Mean treatment duration private hospital                    |                           | 2.526374701     | Derived from national data on mental health-related hospitalisations published by the Australian Institute of Health and Welfare (available at: <a href="https://www.aihw.gov.au/reports-data/health-welfare-services/mental-health-services/data">https://www.aihw.gov.au/reports-data/health-welfare-services/mental-health-services/data</a> )              |
| Effect of disengagement on recovery                         |                           | 0.454296830     | Derived from Australian Bureau of Statistics (2012, Information paper. Use of the Kessler psychological distress scale in ABS health surveys, Australia, 2007-08. Cat. no. 4817.0.55.001. Australian Bureau of Statistics, Canberra)                                                                                                                           |
| Effect of disengagement on psychological distress           |                           | 2.201204000     | Derived from Australian Bureau of Statistics (2012, Information paper. Use of the Kessler psychological distress scale in ABS health                                                                                                                                                                                                                           |

|                                                                          |                 |             |                                                                                                                                                                                                                                                                                                                                                                                     |
|--------------------------------------------------------------------------|-----------------|-------------|-------------------------------------------------------------------------------------------------------------------------------------------------------------------------------------------------------------------------------------------------------------------------------------------------------------------------------------------------------------------------------------|
|                                                                          |                 |             | surveys, Australia, 2007-08. Cat. no. 4817.0.55.001. Australian Bureau of Statistics, Canberra)                                                                                                                                                                                                                                                                                     |
| Disengaged to perceived need for services rate                           |                 | 5.181821348 | Estimated via constrained optimisation                                                                                                                                                                                                                                                                                                                                              |
| Disengagement rate waiting                                               |                 | 0.2620284   | Derived from Tyrer et al. (1995, Lancet 345, 756–759)                                                                                                                                                                                                                                                                                                                               |
| Disengagement rate hospital care                                         |                 | 0.051642558 | Derived from state-level consumer survey data for 2016-17 published by the Australian Institute of Health and Welfare (available at: <a href="https://www.aihw.gov.au/reports-data/health-welfare-services/mental-health-services/data">https://www.aihw.gov.au/reports-data/health-welfare-services/mental-health-services/data</a> )                                              |
| Disengagement rate non-hospital care                                     |                 | 0.03909747  | Derived from state-level consumer survey data for 2016-17 published by the Australian Institute of Health and Welfare (available at: <a href="https://www.aihw.gov.au/reports-data/health-welfare-services/mental-health-services/data">https://www.aihw.gov.au/reports-data/health-welfare-services/mental-health-services/data</a> )                                              |
| Natural recovery rate ratio low distress                                 |                 | 3.225351000 | Derived from Kessler et al. (1997, J. Affect. Disord. 45, 19-30)                                                                                                                                                                                                                                                                                                                    |
| Effect of psychological distress on ED presentation rate                 | High distress   | 7.420126000 | Derived from Australian Bureau of Statistics (2012, Information paper. Use of the Kessler psychological distress scale in ABS health surveys, Australia, 2007-08. Cat. no. 4817.0.55.001. Australian Bureau of Statistics, Canberra)                                                                                                                                                |
|                                                                          | Low distress    | 1           | Reference category                                                                                                                                                                                                                                                                                                                                                                  |
| Post-discharge non-CMHC services referral proportion GP                  |                 | 0.5         | Assumes half of patients not referred to CMHC services after discharge from hospital care are referred to a general practitioner. The remaining patients (i.e., those not referred to CMHC services or a GP) are referred to a psychiatrist or allied mental health professional.                                                                                                   |
| Effect of psychological distress on non-specialised hospitalisation rate | High distress   | 7.420126000 | Derived from Australian Bureau of Statistics (2012, Information paper. Use of the Kessler psychological distress scale in ABS health surveys, Australia, 2007-08. Cat. no. 4817.0.55.001. Australian Bureau of Statistics, Canberra)                                                                                                                                                |
|                                                                          | Low distress    | 1           | Reference category                                                                                                                                                                                                                                                                                                                                                                  |
| Recovery base rate CMHC services                                         |                 | 0.025450458 | Per-service recovery rate derived from data on patient outcomes and numbers of services per patient per year published online by the Australian Institute of Health and Welfare ( <a href="https://www.aihw.gov.au/reports-data/health-welfare-services/mental-health-services/data">https://www.aihw.gov.au/reports-data/health-welfare-services/mental-health-services/data</a> ) |
| Recovery rate online services                                            | High distress   | 0.185074640 | Derived from Christensen et al. (2004, Br. Med. J. 328, 265) and Cuijpers et al. (2009, Br. J. Gen. Pract., doi: 10.3399/bjgp09X395139)                                                                                                                                                                                                                                             |
|                                                                          | Low distress    | 0.400000000 | Derived from Christensen et al. (2004, Br. Med. J. 328, 265)                                                                                                                                                                                                                                                                                                                        |
| Psychological treatment rate GP services                                 |                 | 0.483438750 | Derived from national data on mental health-related general practitioner services published by the Australian Institute of Health and Welfare (available at: <a href="https://www.aihw.gov.au/reports-data/health-welfare-services/mental-health-services/data">https://www.aihw.gov.au/reports-data/health-welfare-services/mental-health-services/data</a> )                      |
| Recovery rate ratio GP services                                          | High distress   | 0.462686600 | Derived from Cuijpers et al. (2009, Br. J. Gen. Pract., doi: 10.3399/bjgp09X395139)                                                                                                                                                                                                                                                                                                 |
|                                                                          | Low distress    | 1           | Reference category                                                                                                                                                                                                                                                                                                                                                                  |
| CMHC services referral rate increase per year                            |                 | 0.085217552 | Estimated via constrained optimisation                                                                                                                                                                                                                                                                                                                                              |
| CMHC services referral rate initial                                      |                 | 0.527696518 | Estimated via constrained optimisation                                                                                                                                                                                                                                                                                                                                              |
| Hospital admission rate increase per year                                |                 | 0.021791898 | Estimated via constrained optimisation                                                                                                                                                                                                                                                                                                                                              |
| Hospital admission rate initial                                          |                 | 0.331107719 | Estimated via constrained optimisation                                                                                                                                                                                                                                                                                                                                              |
| Referral rate psychiatrist and allied services increase per year         |                 | 0.005955229 | Estimated via constrained optimisation                                                                                                                                                                                                                                                                                                                                              |
| Referral rate psychiatrist or allied services initial                    |                 | 0.071123168 | Estimated via constrained optimisation                                                                                                                                                                                                                                                                                                                                              |
| Seeking help GP services base rate age array                             | Age 0-14 years  | 0.366495967 | Estimated via constrained optimisation                                                                                                                                                                                                                                                                                                                                              |
|                                                                          | Age 15-24 years | 1.115622289 | Estimated via constrained optimisation                                                                                                                                                                                                                                                                                                                                              |
|                                                                          | Age 25-44 years | 2.293651367 | Estimated via constrained optimisation                                                                                                                                                                                                                                                                                                                                              |

|                                                                   |                             |                  |                                        |
|-------------------------------------------------------------------|-----------------------------|------------------|----------------------------------------|
|                                                                   | Age 45-64 years             | 2.204450906      | Estimated via constrained optimisation |
|                                                                   | Age 65 years and over       | 0.471827799      | Estimated via constrained optimisation |
| Seeking help GP services rate increase per year                   |                             | 0.040000385      | Estimated via constrained optimisation |
| Seeking help GP services rate ratio regional                      | Major cities areas          | 1.000000000      | Estimated via constrained optimisation |
|                                                                   | Regional and remote areas   | 1.508282829      | Estimated via constrained optimisation |
| Waiting for GP mental health services total initial               |                             | 0.188491369      | Estimated via constrained optimisation |
| Disengaged to perceived need for services rate                    |                             | 5.181821348      | Estimated via constrained optimisation |
| Perceived need for services low distress proportion initial       |                             | 0.362636873      | Estimated via constrained optimisation |
| Perceived need for services total initial                         |                             | 748084.222015000 | Estimated via constrained optimisation |
| Perceiving need for services base rate                            | High psychological distress | 0.187162834      | Estimated via constrained optimisation |
|                                                                   | Low psychological distress  | 0.033458475      | Estimated via constrained optimisation |
| Perceiving need for services rate increase per year               |                             | 0.007467334      | Estimated via constrained optimisation |
| Additional psychiatrist and allied services rate ratio regional   | Major cities areas          | 1                |                                        |
|                                                                   | Regional and remote areas   | 1.088809900      | Estimated via constrained optimisation |
| Additional psychiatrist or allied services rate age array         | Age 0-14 years              | 1.640533470      | Estimated via constrained optimisation |
|                                                                   | Age 15-24 years             | 3.256171142      | Estimated via constrained optimisation |
|                                                                   | Age 25-44 years             | 6.921246425      | Estimated via constrained optimisation |
|                                                                   | Age 45-64 years             | 7.400782920      | Estimated via constrained optimisation |
|                                                                   | Age 65 years and over       | 1.371005333      | Estimated via constrained optimisation |
| Waiting for psychiatrist or allied services total initial         |                             | 0                | Estimated via constrained optimisation |
| Additional CMHC service contacts rate age array                   | Age 0-14 years              | 0.713176065      | Estimated via constrained optimisation |
|                                                                   | Age 15-24 years             | 2.546250034      | Estimated via constrained optimisation |
|                                                                   | Age 25-44 years             | 4.661268738      | Estimated via constrained optimisation |
|                                                                   | Age 45-64 years             | 4.104389999      | Estimated via constrained optimisation |
|                                                                   | Age 65 years and over       | 1.365034230      | Estimated via constrained optimisation |
| CMHC services referral rate ED                                    |                             | 1                | Estimated via constrained optimisation |
| ED presentation base rate                                         | Major cities areas          | 0.001085139      | Estimated via constrained optimisation |
|                                                                   | Regional and remote areas   | 0.002038685      | Estimated via constrained optimisation |
| ED presentation rate ratio age                                    | Age 0-14 years              | 0.609063474      | Estimated via constrained optimisation |
|                                                                   | Age 15-24 years             | 2.077700580      | Estimated via constrained optimisation |
|                                                                   | Age 25-44 years             | 2.211833522      | Estimated via constrained optimisation |
|                                                                   | Age 45-64 years             | 1.435328898      | Estimated via constrained optimisation |
| ED presentation rate ratio perceived need for services            |                             | 2.468338361      | Estimated via constrained optimisation |
| Private hospital referral rate age array                          | Age 0-14 years              | 0.001210065      | Estimated via constrained optimisation |
|                                                                   | Age 15-24 years             | 0.022341652      | Estimated via constrained optimisation |
|                                                                   | Age 25-44 years             | 0.043353931      | Estimated via constrained optimisation |
|                                                                   | Age 45-64 years             | 0.035639274      | Estimated via constrained optimisation |
|                                                                   | Age 65 years and over       | 0.013452506      | Estimated via constrained optimisation |
| Private hospital referral rate ratio regional                     | Major cities areas          | 1                |                                        |
|                                                                   | Regional and remote areas   | 1.532587690      | Estimated via constrained optimisation |
| Additional admission rate non-specialised hospital care age array | Age 0-14 years              | 0.001509506      | Estimated via constrained optimisation |
|                                                                   | Age 15-24 years             | 0.001911865      | Estimated via constrained optimisation |
|                                                                   | Age 25-44 years             | 0.005015641      | Estimated via constrained optimisation |
|                                                                   | Age 45-64 years             | 0.004776943      | Estimated via constrained optimisation |
|                                                                   | Age 65 years and over       | 0.006607063      | Estimated via constrained optimisation |
| Additional non-specialised hospitalisations rate ratio regional   | Major cities areas          | 1                |                                        |
|                                                                   | Regional and remote areas   | 1.198628142      | Estimated via constrained optimisation |
| Psychiatric hospital admission proportion                         | Age 0-14 years              | 0.095543582      | Estimated via constrained optimisation |
|                                                                   | Age 15-24 years             | 0.622199663      | Estimated via constrained optimisation |
|                                                                   | Age 25-44 years             | 0.694479604      | Estimated via constrained optimisation |
|                                                                   | Age 45-64 years             | 0.656433086      | Estimated via constrained optimisation |
|                                                                   | Age 65 years and over       | 0.353545688      | Estimated via constrained optimisation |
| Referred to psychiatric hospital rate                             | Age 0-14 years              | 0.000141380      | Estimated via constrained optimisation |
|                                                                   | Age 15-24 years             | 0.004094285      | Estimated via constrained optimisation |

|                                                                  |                                            |               |                                                                                                                                                          |
|------------------------------------------------------------------|--------------------------------------------|---------------|----------------------------------------------------------------------------------------------------------------------------------------------------------|
|                                                                  | Age 25-44 years                            | 0.004779456   | Estimated via constrained optimisation                                                                                                                   |
|                                                                  | Age 45-64 years                            | 0.004889960   | Estimated via constrained optimisation                                                                                                                   |
|                                                                  | Age 65 years and over                      | 0.008968471   | Estimated via constrained optimisation                                                                                                                   |
| Private outpatient services referral rate age array              | Age 0-14 years                             | 0.000307916   | Estimated via constrained optimisation                                                                                                                   |
|                                                                  | Age 15-24 years                            | 0.103043506   | Estimated via constrained optimisation                                                                                                                   |
|                                                                  | Age 25-44 years                            | 0.259690333   | Estimated via constrained optimisation                                                                                                                   |
|                                                                  | Age 45-64 years                            | 0.367715161   | Estimated via constrained optimisation                                                                                                                   |
|                                                                  | Age 65 years and over                      | 0.087254594   | Estimated via constrained optimisation                                                                                                                   |
| Private outpatient services referral rate ratio regional         | Major cities areas                         | 1             |                                                                                                                                                          |
|                                                                  | Regional and remote areas                  | 0.087856730   | Estimated via constrained optimisation                                                                                                                   |
| <b>Impacts of COVID</b>                                          |                                            |               |                                                                                                                                                          |
| Maximum decrease in overseas arrivals due to COVID               |                                            | 0.213556845   | Estimated via constrained optimisation                                                                                                                   |
| Overseas migration effect duration                               |                                            | 10.207945386  | Estimated via constrained optimisation                                                                                                                   |
| Migration effect starting year                                   |                                            | 2020.167      | Equivalent to March 2020                                                                                                                                 |
| Employed to underemployed rate multiplier ratio                  | Age 15-24 years                            | 0.484686584   | Estimated via constrained optimisation                                                                                                                   |
|                                                                  | Age 25-44 years                            | 1.418987806   | Estimated via constrained optimisation                                                                                                                   |
|                                                                  | Age 45-64 years                            | 1.394526689   | Estimated via constrained optimisation                                                                                                                   |
| Unemployment effect decay rate                                   |                                            | 0.090117940   | Estimated via constrained optimisation                                                                                                                   |
| Unemployment increase effect                                     | Age 15-24 years, Major cities areas        | 2.961413233   | Estimated via constrained optimisation                                                                                                                   |
|                                                                  | Age 15-24 years, Regional and remote areas | 1.988809800   | Estimated via constrained optimisation                                                                                                                   |
|                                                                  | Age 25-44 years, Major cities areas        | 2.905926242   | Estimated via constrained optimisation                                                                                                                   |
|                                                                  | Age 25-44 years, Regional and remote areas | 2.139615477   | Estimated via constrained optimisation                                                                                                                   |
|                                                                  | Age 45-64 years, Major cities areas        | 3.054289606   | Estimated via constrained optimisation                                                                                                                   |
|                                                                  | Age 45-64 years, Regional and remote areas | 1.616352678   | Estimated via constrained optimisation                                                                                                                   |
| Unemployment increase starting year                              |                                            | 2020.167      | Equivalent to March 2020                                                                                                                                 |
| Years to increase unemployment                                   |                                            | 0.002000000   | Estimated via constrained optimisation                                                                                                                   |
| Maximum decrease in services provision due to COVID              |                                            | 0.739989534   | Estimated via constrained optimisation                                                                                                                   |
| Services effect starting year                                    |                                            | 2020.167      | Equivalent to March 2020                                                                                                                                 |
| Services effect duration                                         |                                            | 2.509911587   | Estimated via constrained optimisation                                                                                                                   |
| Effect of doubling psychological distress prevalence on recovery |                                            | 400.065660650 | Estimated via constrained optimisation                                                                                                                   |
| Sense of Community Index decrease                                | Age 15-24 years                            | 0.801450844   | Estimated via constrained optimisation                                                                                                                   |
|                                                                  | Age 25-44 years                            | 0.681282076   | Estimated via constrained optimisation                                                                                                                   |
|                                                                  | Age 45-64 years                            | 0.457028364   | Estimated via constrained optimisation                                                                                                                   |
|                                                                  | Age 65 years and over                      | 0             | Estimated via constrained optimisation                                                                                                                   |
| Social connectedness decay rate                                  |                                            | 0.745789758   | Estimated via constrained optimisation                                                                                                                   |
| Social dislocation duration                                      |                                            | 0.324297202   | Estimated via constrained optimisation                                                                                                                   |
| Years to reach minimum Sense of Community Index                  |                                            | 0.060984348   | Estimated via constrained optimisation                                                                                                                   |
| Social dislocation starting year                                 |                                            | 2020.167      | Equivalent to March 2020                                                                                                                                 |
| Sense of Community Index initial                                 |                                            | 9.149557522   | Derived from Handley et al. (2012, Soc. Psychiatry Psychiatr. Epidemiol. 47, 1281–1290)                                                                  |
| Effect of Sense of Community Index increase on distress          |                                            | 0.64          | Derived from Handley et al. (2012, Soc. Psychiatry Psychiatr. Epidemiol. 47, 1281–1290)                                                                  |
| Effect of doubling unemployment on psychological distress        |                                            | 1.349859      | Derived from Dooley et al., 1988. J. Soc. Issues 44, 107-123                                                                                             |
| Effect of doubling unemployment on unemployment effect           |                                            | 1.000000000   | Derived from Dooley et al., 1988. J. Soc. Issues 44, 107-123                                                                                             |
| Post-secondary study proportion employed                         |                                            | 0.678309365   | Derived from Australian Bureau of Statistics (2020, Education and work, Australia, May 2020. Cat. no. 6227.0. Australian Bureau of Statistics, Canberra) |
| Pre-intervention proportion discontinuing study unemployed       |                                            | 0.5           | Assumes that half of post-secondary students becoming unemployed due to the COVID-19 pandemic will discontinue study                                     |
| Pre-COVID recovery base rate                                     | Age 15-24 years                            | 0.06833333    | Derived from Jokela et al. (2011, J. Affect. Disord. 130, 454-461)                                                                                       |
|                                                                  | Age 25-44 years                            | 0.06833333    | Derived from Jokela et al. (2011, J. Affect. Disord. 130, 454-461)                                                                                       |
|                                                                  | Age 45-64 years                            | 0.06833333    | Derived from Jokela et al. (2011, J. Affect. Disord. 130, 454-461)                                                                                       |
|                                                                  | Age 65 years and over                      | 0.06833333    | Derived from Jokela et al. (2011, J. Affect. Disord. 130, 454-461)                                                                                       |

|                                                                              |                           |                |                                                                                                                                                                                                                                                                                                                                              |
|------------------------------------------------------------------------------|---------------------------|----------------|----------------------------------------------------------------------------------------------------------------------------------------------------------------------------------------------------------------------------------------------------------------------------------------------------------------------------------------------|
| Pre-COVID self-harm hospitalisation rate ratio psychological distress        |                           | 10.00004       | Derived from Chamberlain et al. (2009, Crisis 30, 39–42)                                                                                                                                                                                                                                                                                     |
| <b>Intervention: Employment programs</b>                                     |                           |                |                                                                                                                                                                                                                                                                                                                                              |
| Employment programs starting year                                            |                           | 2020.333000000 | Equivalent to May 2020                                                                                                                                                                                                                                                                                                                       |
| Years to implement employment programs                                       |                           | 0.166666667    | Equivalent to two months                                                                                                                                                                                                                                                                                                                     |
| Employment programs duration                                                 |                           | 0.916666667    | Equivalent to eleven months. Reflects employment programs ending in April 2021                                                                                                                                                                                                                                                               |
| Effect of employment programs on employed to unemployed rate                 |                           | 0.56           | Derived from Business Indicators, Business Impacts of COVID-19 (ABS survey, April 2020)                                                                                                                                                                                                                                                      |
| Effect of employment programs on employment initiation rate                  |                           | 1              | Equivalent to no effect of employment programs on employment initiation                                                                                                                                                                                                                                                                      |
| <b>Intervention: Better Access</b>                                           |                           |                |                                                                                                                                                                                                                                                                                                                                              |
| Services per patient increase starting year                                  |                           | 2020.75        | Equivalent to October 2020 as additional COVID-19 MBC mental health support commenced then                                                                                                                                                                                                                                                   |
| Years to implement services per patient increase                             |                           | 0.166666667    | Equivalent to two months                                                                                                                                                                                                                                                                                                                     |
| Services per patient increase duration                                       |                           | 1.75           | Additional COVID-19 MBS mental health support to end on 30 Jun 2022                                                                                                                                                                                                                                                                          |
| Proportion of specialised services provided by psychiatrists                 | Major cities areas        | 0.376508398    | Derived from data on Medicare-subsidised mental health services published by the Australian Institute of Health and Welfare (available at: <a href="https://www.aihw.gov.au/reports-data/health-welfare-services/mental-health-services/data">https://www.aihw.gov.au/reports-data/health-welfare-services/mental-health-services/data</a> ) |
|                                                                              | Regional and remote areas | 0.279133644    | Derived from data on Medicare-subsidised mental health services published by the Australian Institute of Health and Welfare (available at: <a href="https://www.aihw.gov.au/reports-data/health-welfare-services/mental-health-services/data">https://www.aihw.gov.au/reports-data/health-welfare-services/mental-health-services/data</a> ) |
| Pre-intervention services per patient                                        | Major cities areas        | 5.13103948     | Derived from data on Medicare-subsidised mental health services published by the Australian Institute of Health and Welfare (available at: <a href="https://www.aihw.gov.au/reports-data/health-welfare-services/mental-health-services/data">https://www.aihw.gov.au/reports-data/health-welfare-services/mental-health-services/data</a> ) |
|                                                                              | Regional and remote areas | 4.073157206    | Derived from data on Medicare-subsidised mental health services published by the Australian Institute of Health and Welfare (available at: <a href="https://www.aihw.gov.au/reports-data/health-welfare-services/mental-health-services/data">https://www.aihw.gov.au/reports-data/health-welfare-services/mental-health-services/data</a> ) |
| Additional psychiatrist and allied services per patient                      |                           | 4              | Patients will attend an additional 4 consultations per year when the cap on the number of consultations per patient is increased.                                                                                                                                                                                                            |
| Better Access services per week                                              |                           | 1              | Patients attend 1 consultation per week                                                                                                                                                                                                                                                                                                      |
| <b>Intervention: Awareness campaigns</b>                                     |                           |                |                                                                                                                                                                                                                                                                                                                                              |
| Mental health education programs starting year                               |                           | 2022           | Equivalent to January 2022                                                                                                                                                                                                                                                                                                                   |
| Years to implement mental health education programs                          |                           | 0.1666667      | Equivalent to two months                                                                                                                                                                                                                                                                                                                     |
| Mental health education programs duration                                    |                           | 5              | Equivalent to five years                                                                                                                                                                                                                                                                                                                     |
| Effect of mental health education on engagement                              |                           | 1.585327       | Derived from Jorm et al. (2003, Psychol. Med. 33, 1071-1079).                                                                                                                                                                                                                                                                                |
| Effect of mental health education initial                                    |                           | 1              |                                                                                                                                                                                                                                                                                                                                              |
| Effect of mental health education decay rate                                 |                           | 1              |                                                                                                                                                                                                                                                                                                                                              |
| <b>Intervention: Education programs</b>                                      |                           |                |                                                                                                                                                                                                                                                                                                                                              |
| Education programs starting year                                             |                           | 2022           | Equivalent to January 2022                                                                                                                                                                                                                                                                                                                   |
| Years to implement education programs                                        |                           | 0.1666667      | Equivalent to two months                                                                                                                                                                                                                                                                                                                     |
| Education programs duration                                                  |                           | 5              | Equivalent to five years                                                                                                                                                                                                                                                                                                                     |
| Effect of education programs on discontinuation rate                         |                           | 0.1            | Reduce the proportion of students discontinuing study after becoming unemployed by 90%.                                                                                                                                                                                                                                                      |
| Effect of education programs on post-secondary study commencement rate 15-24 |                           | 2              | Equivalent to a increase of per capita enrolment rate by 100%                                                                                                                                                                                                                                                                                |
| <b>Intervention: Jobs creation programs</b>                                  |                           |                |                                                                                                                                                                                                                                                                                                                                              |
| Jobs creation programs starting year                                         |                           | 2022           | Equivalent to January 2022                                                                                                                                                                                                                                                                                                                   |

|                                                                                          |                             |             |                                                                                                                                                                                                                                                                                                                                                                                                                                                                                                                   |
|------------------------------------------------------------------------------------------|-----------------------------|-------------|-------------------------------------------------------------------------------------------------------------------------------------------------------------------------------------------------------------------------------------------------------------------------------------------------------------------------------------------------------------------------------------------------------------------------------------------------------------------------------------------------------------------|
| Years to implement Jobs creation programs                                                |                             | 0.1666667   | Equivalent to two months                                                                                                                                                                                                                                                                                                                                                                                                                                                                                          |
| Jobs creation programs duration                                                          |                             | 2           | Equivalent to two years                                                                                                                                                                                                                                                                                                                                                                                                                                                                                           |
| Effect on employment initiation                                                          |                             | 2           | Increase the rate of employment initiation by 100%                                                                                                                                                                                                                                                                                                                                                                                                                                                                |
| <b>Intervention: Services capacity growth</b>                                            |                             |             |                                                                                                                                                                                                                                                                                                                                                                                                                                                                                                                   |
| GP services capacity increase starting year                                              |                             | 2022        | Equivalent to January 2022                                                                                                                                                                                                                                                                                                                                                                                                                                                                                        |
| Psychiatrist and allied services capacity increase starting year                         |                             | 2022        | Equivalent to January 2022                                                                                                                                                                                                                                                                                                                                                                                                                                                                                        |
| CMHC services capacity increase starting year                                            |                             | 2022        | Equivalent to January 2022                                                                                                                                                                                                                                                                                                                                                                                                                                                                                        |
| Post-intervention GP services capacity increase per year multiplier                      |                             | 2           | Increase capacity growth by 100%                                                                                                                                                                                                                                                                                                                                                                                                                                                                                  |
| Post-intervention psychiatrist and allied services capacity increase per year multiplier |                             | 2           | Increase capacity growth by 100%                                                                                                                                                                                                                                                                                                                                                                                                                                                                                  |
| Post-intervention CMHC services capacity increase per year multiplier                    |                             | 2           | Increase capacity growth by 100%                                                                                                                                                                                                                                                                                                                                                                                                                                                                                  |
| <b>Intervention: Technology-enabled care</b>                                             |                             |             |                                                                                                                                                                                                                                                                                                                                                                                                                                                                                                                   |
| Technology-enabled care starting year                                                    |                             | 2022        | Equivalent to January 2022                                                                                                                                                                                                                                                                                                                                                                                                                                                                                        |
| Years to implement technology-enabled care                                               |                             | 2           | Equivalent to two years                                                                                                                                                                                                                                                                                                                                                                                                                                                                                           |
| Technology-enabled care duration                                                         |                             | 999         | Equivalent to 999 years                                                                                                                                                                                                                                                                                                                                                                                                                                                                                           |
| Maximum technology-enabled care rate per service                                         |                             | 0.7         | The default value (0.7) assumes that technology-enabled, measurement-based care will be provided in 70% of mental health services completed when fully implemented.                                                                                                                                                                                                                                                                                                                                               |
| Effect of technology-enabled care on referrals to specialised care                       | Low psychological distress  | 1           |                                                                                                                                                                                                                                                                                                                                                                                                                                                                                                                   |
|                                                                                          | High psychological distress | 1.265913    | Derived from Badamgarav et al. (2003, Am. J. Psychiatry 160, 2080-2090).                                                                                                                                                                                                                                                                                                                                                                                                                                          |
| Effect of technology-enabled care on recovery rate                                       |                             | 1.177321    | Derived from Woltmann et al. (2012, Am. J. Psychiatry 169, 790-804)                                                                                                                                                                                                                                                                                                                                                                                                                                               |
| Effect of technology-enabled care on disengagement                                       |                             | 0.5204988   | Derived from Badamgarav et al. (2003, Am. J. Psychiatry 160, 2080-2090).                                                                                                                                                                                                                                                                                                                                                                                                                                          |
| Pre-intervention recovery rate mental health treatment                                   | Low psychological distress  | 0.087421601 | Per-service recovery rates derived from treatment effectiveness estimates reported in Thase et al. (1997, Arch. Gen. Psychiatry 54, 1009–1015) and data on numbers of services per patient per year published online by the Australian Institute of Health and Welfare ( <a href="https://www.aihw.gov.au/reports/primary-health-care/medicare-subsidised-gp-allied-health-and-specialis/data">https://www.aihw.gov.au/reports/primary-health-care/medicare-subsidised-gp-allied-health-and-specialis/data</a> ). |
|                                                                                          | High psychological distress | 0.076531002 | Per-service recovery rates derived from treatment effectiveness estimates reported in Thase et al. (1997, Arch. Gen. Psychiatry 54, 1009–1015) and data on numbers of services per patient per year published online by the Australian Institute of Health and Welfare ( <a href="https://www.aihw.gov.au/reports/primary-health-care/medicare-subsidised-gp-allied-health-and-specialis/data">https://www.aihw.gov.au/reports/primary-health-care/medicare-subsidised-gp-allied-health-and-specialis/data</a> ). |
| <b>Intervention: Post-suicide attempt care</b>                                           |                             |             |                                                                                                                                                                                                                                                                                                                                                                                                                                                                                                                   |
| Post-attempt care starting year                                                          |                             | 2022        | Equivalent to January 2022                                                                                                                                                                                                                                                                                                                                                                                                                                                                                        |
| Years to implement post-attempt care                                                     |                             | 2           | Equivalent to two years                                                                                                                                                                                                                                                                                                                                                                                                                                                                                           |
| Post-attempt care program duration                                                       |                             | 999         | Equivalent to 999 years                                                                                                                                                                                                                                                                                                                                                                                                                                                                                           |
| Post-attempt care effect estimate                                                        |                             | 0.3975155   | The default estimate is derived from Hvid et al. (2011, Nord. J. Psychiatry 65, 292-298).                                                                                                                                                                                                                                                                                                                                                                                                                         |
| Maximum post-attempt care rate                                                           |                             | 0.7         | Assumes that post-attempt care will be provided to 70% of patients hospitalised for a suicide attempt when post-attempt care programs are fully implemented.                                                                                                                                                                                                                                                                                                                                                      |
| Post-attempt care effect duration                                                        |                             | 52.14285714 | Equivalent to one calendar year                                                                                                                                                                                                                                                                                                                                                                                                                                                                                   |
| Repeat attempt rate per year                                                             |                             | 0.179000000 | Derived from Carroll et al. (2014, PLoS ONE 9, e89944).                                                                                                                                                                                                                                                                                                                                                                                                                                                           |

## REFERENCES

Australian Bureau of Statistics. Business Indicators, Business Impacts of COVID-19. April 2020. Available online: <https://www.abs.gov.au/statistics/economy/business-indicators/business-conditions-and-sentiments/apr-2020> (accessed 30 May 2020).

Badamgarav E, Weingarten SR, Henning JM, Knight K, Hasselblad V, Gano A, Jr., Ofman JJ. Effectiveness of disease management programs in depression: a systematic review. *Am J Psychiatry*. 2003;160(12):2080-2090.

Carroll R, Metcalfe C, Gunnell D. Hospital presenting self-harm and risk of fatal and non-fatal repetition: systematic review and meta-analysis. *PLoS One*. 2014;9(2):e89944.

Hvid M, Vangborg K, Sorensen HJ, Nielsen IK, Stenborg JM, Wang AG. Preventing repetition of attempted suicide--II. The Amager project, a randomized controlled trial. *Nord J Psychiatry*. 2011;65(5):292-298.

Jorm AF, Griffiths KM, Christensen H, Korten AE, Parslow RA, Rodgers B. Providing information about the effectiveness of treatment options to depressed people in the community: a randomized controlled trial of effects on mental health literacy, help-seeking and symptoms. *Psychol Med*. 2003;33(6):1071-1079.

Woltmann E, Grogan-Kaylor A, Perron B, Georges H, Kilbourne AM, Bauer MS. Comparative effectiveness of collaborative chronic care models for mental health conditions across primary, specialty, and behavioral health care settings: systematic review and meta-analysis. *Am J Psychiatry*. 2012;169(8):790-804.
